# Supplementary material for: A novel classification of hematologic conditions in patients with Fanconi anemia
Source: PubMed Central journal article supplement — Haematologica. 2021 Jul 1;106(11):3000–3. doi: 10.3324/haematol.2021.279332 (PMC8561275; doi:10.3324/haematol.2021.279332), 2021-07-01
Supplement: 2021_279332_BEHRENS_SUPPL.pdf [file 2021_279332_BEHRENS_SUPPL.pdf]

**A novel classification of hematologic conditions in patients with Fanconi anemia**

Yvonne Lisa Behrens,<sup>1\*</sup> Gudrun Göhring,<sup>1\*</sup> Randa Bawadi,<sup>1</sup> Sümeyye Cöktü,<sup>2</sup> Christina Reimer,<sup>2</sup> Beatrice Hoffmann,<sup>2</sup> Birte Säger,<sup>2</sup> Simon Käfer,<sup>1</sup> Felicitas Thol,<sup>3</sup> Miriam Erlacher,<sup>4,5,6</sup> Charlotte M. Niemeyer,<sup>4,5,6</sup> Irith Baumann,<sup>7</sup> Reinhard Kalb,<sup>8</sup> Detlev Schindler<sup>8</sup> and Christian Peter Kratz<sup>2</sup>

\*YLB and GG contributed equally as co-first authors.

<sup>1</sup>Department of Human Genetics, Hannover Medical School, Hannover; <sup>2</sup>Pediatric Hematology and Oncology, Hannover Medical School, Hannover; <sup>3</sup>Department of Hematology, Hemostasis, Oncology and Stem Cell Transplantation, Hannover Medical School, Hannover; <sup>4</sup>Division of Pediatric Hematology and Oncology, Department of Pediatrics and Adolescent Medicine, University Medical Center Freiburg, Faculty of Medicine, University of Freiburg, Freiburg; <sup>5</sup>German Cancer Consortium (DKTK), Freiburg; <sup>6</sup>German Cancer Research Center (DKFZ), Heidelberg; <sup>7</sup>Institute of Pathology, Kaufbeuren and <sup>8</sup>Department of Human Genetics, University of Würzburg, Biocenter, Würzburg, Germany

Correspondence: CHRISTIAN P. KRATZ - [kratz.christian@mh-hannover.de](mailto:kratz.christian@mh-hannover.de)

doi:10.3324/haematol.2024.279332

**Table S1. Follow-up examinations of FA patients (n=86).** Recurrent cytogenetic aberrations relevant for classification are highlighted in red.

| FA-ID | Sex | Age at FA diagnosis (years) | complementation group | HSCT (yes/no) → if yes: age of HSCT (years) | death (yes/no) → if yes: age of death (years) | Age at last follow up (years) | Age of transformation (years) | Blast count                        | Classification | Age at karyotype analysis (years)                        | Karyotype (ISCN)                                                                                                                                                                                                                                                                                                                                                                                                                                                                                                                                                                                                                                                                                                                                                                                                                                                                                                                                                                                                                                                                                                                                                                                                                                                                                    | Recurrent aberrations | Clonal evolution (yes/ no) |
|-------|-----|-----------------------------|-----------------------|---------------------------------------------|-----------------------------------------------|-------------------------------|-------------------------------|------------------------------------|----------------|----------------------------------------------------------|-----------------------------------------------------------------------------------------------------------------------------------------------------------------------------------------------------------------------------------------------------------------------------------------------------------------------------------------------------------------------------------------------------------------------------------------------------------------------------------------------------------------------------------------------------------------------------------------------------------------------------------------------------------------------------------------------------------------------------------------------------------------------------------------------------------------------------------------------------------------------------------------------------------------------------------------------------------------------------------------------------------------------------------------------------------------------------------------------------------------------------------------------------------------------------------------------------------------------------------------------------------------------------------------------------|-----------------------|----------------------------|
| FA1   | M   | 5                           | not known             | yes (9)                                     | no                                            | 13                            | -                             | <5% (BM) and <2% (PB)              | FA-BMF         | 5<br>7<br>9<br>9                                         | 46,XY[20]<br>46,XY[20].nuc ish 3q26(EV11x2),cen7(CEP7x2),7q31(D7S486x2),cen8(CEP8x2)[100]<br>46,XY[15].nuc ish 3q26(EV11x2),cen7(CEP7x2),7q31(D7S486x2),cen8(CEP8x2)[100]<br>nuc ish 3q26(EV11x2),cen7(CEP7x2),7q31(D7S486x2),cen8(CEP8x2),21q22(AML1x2)[100]                                                                                                                                                                                                                                                                                                                                                                                                                                                                                                                                                                                                                                                                                                                                                                                                                                                                                                                                                                                                                                       | -                     | -                          |
| FA2   | M   | 6                           | FANCA                 | yes (7 and 11)                              | no                                            | 11                            | 11                            | <5% (BM) and <2% (PB)              | FA-MDS-non EB  | 7<br>11<br>11<br>11                                      | 47,-49,XY,+add(1)(p34),dup(3)(q13q26),+9,del(11)(q?23),del(13)(q13q21),+19,+21[cp6]/46,XX[1].<br>nuc ish cen7(CEP7x2),7q31(D7S486x2),cen8(CEP8x2)[100]<br>47-50,XY,del(X)(q21q27),+add(1)(p34),dup(3)(q13q26),+9,add(9)(q21),add(10)(p14),del(11)(q?23),del(13)(q13q21),+18,+19,+21[cp20]<br>46,XY,inc[6].nuc ish cen9(CEP9x2),09p21(P16x2)[93/100]<br>48-50,XY,+add(1)(p34),dup(3)(q13q26),+9,del(11)(q?23),del(13)(q13q21),+19,+21[cp2]/46,XY[3].<br>nuc ish 9p21(P16x3),cen9(CEP9x3)[26/100],13q14(RB1x2),13q34(13q34x2)[100/100]                                                                                                                                                                                                                                                                                                                                                                                                                                                                                                                                                                                                                                                                                                                                                                | 1q+; 3q+              | yes                        |
| FA3   | M   | 2                           | FANCD1                | no                                          | yes (3)                                       | 3                             | 3                             | ≥5 to <20% (BM) or ≥2 to <20% (PB) | FA-MDS-EB      | 2<br>3                                                   | 46,XY,del(7)(q21q31)[2]/46,XY,add(20)(q13)[2]/46,XY[17].nuc ish cen7(CEP7x2),7q31(D7S486x2),cen8(CEP8x2),20q12(D20S108x2)[100]<br>46,XY,del(2)(q?14q?22),?t(6;11)(p24;q23),del(7)(q21q31),add(8)(q24),del(13)(q14q21),add(17)(p13) [cp20].nuc ish 3q26(EV11x3)[37/100],11q23(MLLx2)(5'MLLsep3'MLLx1)[95/100], 17p13.1(P53x2),cen7(CEP7x2)[100/100],21q22(AML1x2)[99/100]                                                                                                                                                                                                                                                                                                                                                                                                                                                                                                                                                                                                                                                                                                                                                                                                                                                                                                                            | 7q-                   | yes                        |
| FA4   | M   | 10                          | FANCA                 | no                                          | no                                            | 16                            | -                             | <5% (BM) and <2% (PB)              | FA-BMF         | 10<br>11<br>12<br>13<br>14<br>15<br>16<br>11<br>12<br>13 | 46,XY[20].nuc ish 3q26(EV11x2),cen7(CEP7x2),7q31(D7S486x2),cen8(CEP8x2)[100]<br>46,XY,inc[11].nuc ish cen7(CEP7x2),7q31(D7S486x2),cen8(CEP8x2)[100]<br>46,XY[20].nuc ish 3q26(EV11x2),cen7(CEP7x2),7q31(D7S486x2),cen8(CEP8x2)[100]<br>46,XY[15].nuc ish 3q26(EV11x2)[100/100],cen7(CEP7x2),7q31(D7S486x2)[100/100], cen8(CEP8x2)[95/100]<br>46,XY[13].nuc ish 3q26(EV11x2)[100/100],cen7(CEP7x2),7q31(D7S486x2)[99/100], cen8(CEP8x2)[100/100],21q22(AML1x2)[99/100]<br>46,XY,inc[15].nuc ish 3q26(EV11x2)[100/100],cen7(CEP7x2),7q31(D7S486x2)[97/100]<br>46,XX[15]<br>46,XX[20]<br>46,XX[16].nuc ish 3q26(EV11x2),cen7(CEP7x2),7q31(D7S486x2),cen8(CEP8x2)[100]<br>46,XX,inc[3].nuc ish 3q26(EV11x2),cen7(CEP7x2),7q31(D7S486x2),cen8(CEP8x2)[100]<br>46,XX[20].nuc ish 3q26(EV11x2),cen8(CEP8x2),cen7(CEP7x2),7q31(D7S486x2)[100]<br>46,XX[16].nuc ish 3q26(EV11x2),cen7(CEP7x2),7q31(D7S486x2),cen8(CEP8x2)[100]<br>46,XX[20].nuc ish 3q26(EV11x2),cen7(CEP7x2),7q31(D7S486x2),cen8(CEP8x2)[100]<br>46,XX[20].nuc ish cen7(CEP7x2),7q31(D7S486x2),cen8(CEP8x2)[100]<br>46,XX,inc[6].nuc ish 1p36(SRDx2),1q21(1q21x2)[100/100],cen7(CEP7x2),7q31(D7S486x2)[100/100], cen8(CEP8x2)[100/100]<br>46,XX[15].nuc ish 3q26(EV11x2)[99/100],cen7(CEP7x2),7q31(D7S486x2)[100/100], cen8(CEP8x2)[99/100] | -                     | -                          |
| FA5   | F   | 10                          | not known             | no                                          | no                                            | 20                            | -                             | <5% (BM) and <2% (PB)              | FA-BMF         | 16<br>16<br>18<br>19<br>20                               | 46,XX[18].nuc ish cen7(CEP7x2),7q31(D7S486x2),cen8(CEP8x2)[100]<br>46,XX[15].nuc ish 3q26(EV11x2),cen7(CEP7x2),7q31(D7S486x2),cen8(CEP8x2)[100]<br>46,XX,inc[10].nuc ish cen7(CEP7x2),7q31(D7S486x2),cen8(CEP8x2),3q26(EV11x2)[100]<br>46,XX[16]<br>46,XX[5].nuc ish 3q26(EV11x2),cen7(CEP7x2),7q31(D7S486x2),cen8(CEP8x2)[100]<br>46,XX[6].nuc ish cen7(CEP7x2),7q31(D7S486x2),cen8(CEP8x2),3q26(EV11x2)[100]<br>46,XX[14].nuc ish 3q26(EV11x2),cen7(CEP7x2),7q31(D7S486x2),cen8(CEP8x2)[100]<br>46,XX[15].nuc ish 3q26(EV11x2)[96/100],cen7(CEP7x2),7q31(D7S486x2) [98/100],cen8(CEP8x2)[100/100]<br>46,XX,dup(1)(q23q42)[7]/46,XX[8]. nuc ish 3q26(EV11x2)[99/100], cen7(CEP7x2),7q31(D7S486x2)[99/100],cen8(CEP8x2)[97/100]<br>46,XX,dup(1)(q23q41)[9]/46,XX[6]. nuc ish 3q26(EV11x2)[99/100], cen7(CEP7x2),7q31(D7S486x2)[98/100],cen8(CEP8x2)[96/100]<br>46,XX,dup(1)(q23q41)[9]/46,XX[7].nuc ish 3q26(EV11x2)[99/100], cen7(CEP7x2),7q31(D7S486x2)[99/100],cen8(CEP8x2)[98/100]                                                                                                                                                                                                                                                                                                              | -                     | -                          |
| FA6   | F   | 13                          | FANCA                 | no                                          | no                                            | 24                            | 24                            | <5% (BM) and <2% (PB)              | FA-MDS-non EB  | 22<br>23<br>23                                           | 46,XX,inc[18].nuc ish 3q26(EV11x2),cen7(CEP7x2),7q31(D7S486x2),cen8(CEP8x2)[100]<br>46,XX,inc[10].nuc ish cen7(CEP7x2),7q31(D7S486x2),cen8(CEP8x2),3q26(EV11x2)[100]<br>46,XX[16]<br>46,XX[5].nuc ish 3q26(EV11x2),cen7(CEP7x2),7q31(D7S486x2),cen8(CEP8x2)[100]<br>46,XX[6].nuc ish cen7(CEP7x2),7q31(D7S486x2),cen8(CEP8x2),3q26(EV11x2)[100]<br>46,XX[14].nuc ish 3q26(EV11x2),cen7(CEP7x2),7q31(D7S486x2),cen8(CEP8x2)[100]<br>46,XX[15].nuc ish 3q26(EV11x2)[96/100],cen7(CEP7x2),7q31(D7S486x2) [98/100],cen8(CEP8x2)[100/100]<br>46,XX,dup(1)(q23q42)[7]/46,XX[8]. nuc ish 3q26(EV11x2)[99/100], cen7(CEP7x2),7q31(D7S486x2)[99/100],cen8(CEP8x2)[97/100]<br>46,XX,dup(1)(q23q41)[9]/46,XX[6]. nuc ish 3q26(EV11x2)[99/100], cen7(CEP7x2),7q31(D7S486x2)[98/100],cen8(CEP8x2)[96/100]<br>46,XX,dup(1)(q23q41)[9]/46,XX[7].nuc ish 3q26(EV11x2)[99/100], cen7(CEP7x2),7q31(D7S486x2)[99/100],cen8(CEP8x2)[98/100]                                                                                                                                                                                                                                                                                                                                                                             | 1q+, 3q+              | yes                        |

|      |   |    |           |         |    |    |    |                                    |               |    |                                                                                                               |                                                                                                                                                                                                                  |     |  |
|------|---|----|-----------|---------|----|----|----|------------------------------------|---------------|----|---------------------------------------------------------------------------------------------------------------|------------------------------------------------------------------------------------------------------------------------------------------------------------------------------------------------------------------|-----|--|
|      |   |    |           |         |    |    |    |                                    |               |    | 24                                                                                                            | 46,XX,dup(1)(q23q41)[5]/46,idem,der(22)t(3;22)(q26;p12)[5]/46,XX[5].ish der(22)t(3;22)(EV11+)[4/13].nuc ish 3q26(EV11x3)[16/100],cen7(CEP7x2),7q31(D7S486x2)[97/100],cen8(CEP8x2)[98/100],21q22 (AML1x2)[98/100] |     |  |
|      |   |    |           |         |    |    |    |                                    |               |    | 24                                                                                                            | 46,XX,dup(1)(q23q41)[2]/46,idem,der(22)t(3;22)(q26;p12)[10]/46,XX[3].nuc ish 3q26(EV11x3)[29/100]                                                                                                                |     |  |
|      |   |    |           |         |    |    |    |                                    |               |    | 24                                                                                                            | 46,XX,dup(1)(q23q41)[7]/46,idem,der(22)t(3;22)(q26;p12)[13].nuc ish 3q26(EV11x3)[60/100]                                                                                                                         |     |  |
| FA7  | F | ?  | FANCP     | no      | no | 6  | -  | <5% (BM) and <2% (PB)              | FA-BMF        | 6  | 46,XX[10].nuc ish 3q26(EV11x2)[100/100],3q26(EV11x2),cen7(CEP7x2),7q31(D7S486x2)[95/100],cen8(CEP8x2)[97/100] | -                                                                                                                                                                                                                | -   |  |
| FA8  | F | ?  | FANCP     | no      | no | 7  | -  | <5% (BM) and <2% (PB)              | FA-BMF        | 7  | 46,XX[3].nuc ish cen7(CEP7x2),7q31(D7S486x2),cen8(CEP8x2),3q26(EV11x2),21q22(AML1x2)[100]                     | -                                                                                                                                                                                                                | -   |  |
|      |   |    |           |         |    |    |    |                                    |               |    | 4                                                                                                             | 46,XX[20].nuc ish cen7(CEP7x2),7q31(D7S486x2),cen8(CEP8x2)3q26(EV11x2)[100]                                                                                                                                      |     |  |
|      |   |    |           |         |    |    |    |                                    |               |    | 5                                                                                                             | 46,XX[17].nuc ish cen7(CEP7x2),7q31(D7S486x2),cen8(CEP8x2)[100]                                                                                                                                                  |     |  |
|      |   |    |           |         |    |    |    |                                    |               |    | 6                                                                                                             | 46,XX[1].nuc ish 3q26(EV11x2),cen7(CEP7x2),7q31(D7S486x2),cen8(CEP8x2)[100]                                                                                                                                      |     |  |
| FA9  | F | 4  | not known | no      | no | 9  | -  | <5% (BM) and <2% (PB)              | FA-BMF        | 8  | 46,XY[15].nuc ish 3q26(EV11x2)[100/100], cen7(CEP7x2),7q31(D7S486x2)[99/100],cen8(CEP8x2)[99/100]             | -                                                                                                                                                                                                                | -   |  |
|      |   |    |           |         |    |    |    |                                    |               |    | 8                                                                                                             | 46,XX[17].nuc ish 3q26(EV11x2)[99/100], cen7(CEP7x2),7q31(D7S486x2)[100/100],cen8(CEP8x2)[100/100]                                                                                                               |     |  |
|      |   |    |           |         |    |    |    |                                    |               |    | 9                                                                                                             | 46,XX[15].nuc ish 3q26(EV11x2)[100/100], cen7(CEP7x2),7q31(D7S486x2)[97/100],21q22(AML1x2)[99/100]                                                                                                               |     |  |
| FA10 | M | ?  | FANCI     | no      | no | 7  | -  | <5% (BM) and <2% (PB)              | FA-BMF        | 7  | 46,XY[25].nuc ish cen7(CEP7x2),7q31(D7S486x2),cen8(CEP8x2),3q26(EV11x2)[100]                                  | -                                                                                                                                                                                                                | -   |  |
|      |   |    |           |         |    |    |    |                                    |               |    | 2                                                                                                             | 46,XY[15].nuc ish 3q26(EV11x2),cen7(CEP7x2),7q31(D7S486x2),cen8(CEP8x2)[100]                                                                                                                                     |     |  |
|      |   |    |           |         |    |    |    |                                    |               |    | 3                                                                                                             | 46,XY[20].nuc ish 3q26(EV11x2),cen7(CEP7x2),7q31(D7S486x2),cen8(CEP8x2)[100]                                                                                                                                     |     |  |
|      |   |    |           |         |    |    |    |                                    |               |    | 3                                                                                                             | 46,XY[15].nuc ish 3q26(EV11x2),cen7(CEP7x2),7q31(D7S486x2),cen8(CEP8x2)[100]                                                                                                                                     |     |  |
|      |   |    |           |         |    |    |    |                                    |               |    | 5                                                                                                             | 46,XY[16].nuc ish 3q26(EV11x2),cen7(CEP7x2),7q31(D7S486x2),cen8(CEP8x2)[100]                                                                                                                                     |     |  |
| FA11 | M | 2  | FANCA     | no      | no | 8  | -  | <5% (BM) and <2% (PB)              | FA-BMF        | 6  | 46,XX[15].nuc ish 3q26(EV11x2)[98/100], cen7(CEP7x2),7q31(D7S486x2)[100/100],cen8(CEP8x2)[100/100]            | -                                                                                                                                                                                                                | -   |  |
|      |   |    |           |         |    |    |    |                                    |               |    | 7                                                                                                             | 46,XY[15].nuc ish 3q26(EV11x2)[100/100], cen7(CEP7x2),7q31(D7S486x2)[98/100],cen8(CEP8x2)[96/100]                                                                                                                |     |  |
|      |   |    |           |         |    |    |    |                                    |               |    | 8                                                                                                             | 46,XY[15].nuc ish 3q26(EV11x2)[100/100],cen7(CEP7x2),7q31(D7S486x2)[99/100],cen8(CEP8x2)[97/100],21q22(AML1x2)[99/100]                                                                                           |     |  |
|      |   |    |           |         |    |    |    |                                    |               |    | 12                                                                                                            | 46,XY[20].nuc ish cen7(CEP7x2),7q31(D7S486x2),cen8(CEP8x2)[100]                                                                                                                                                  |     |  |
|      |   |    |           |         |    |    |    |                                    |               |    | 15                                                                                                            | nuc ish 17p13.1(P53x2),cen17(CEP17x2)[100]                                                                                                                                                                       |     |  |
|      |   |    |           |         |    |    |    |                                    |               |    | 16                                                                                                            | 46,XY[20].nuc ish 16q22(CBFBx2)[100]                                                                                                                                                                             |     |  |
|      |   |    |           |         |    |    |    |                                    |               |    | 17                                                                                                            | 46,XY,der(13)t(1;13)(q12;p11)[2]/46,XY[18].nuc ish 1p36(SRDx2),1q21(1q21x2),3q26(EV11x2),cen7(CEP7x2),7q31(D7S486x2),cen8(CEP8x2)[100]                                                                           |     |  |
|      |   |    |           |         |    |    |    |                                    |               |    | 17                                                                                                            | 46,XY[15].nuc ish 3q26(EV11x2),cen7(CEP7x2),7q31(D7S486x2),cen8(CEP8x2)[100]                                                                                                                                     |     |  |
|      |   |    |           |         |    |    |    |                                    |               |    | 18                                                                                                            | 47,XY,+8[1]/46,XY[25].nuc ish 3q26(EV11x2)[100/100],cen7(CEP7x2),7q31(D7S486x2)[100/100],cen8(CEP8x3)[9/100]                                                                                                     |     |  |
|      |   |    |           |         |    |    |    |                                    |               |    | 18                                                                                                            | 47,XY,+8[5]/46,XY[15].nuc ish cen8(CEP8x3)[11/100]                                                                                                                                                               |     |  |
|      |   |    |           |         |    |    |    |                                    |               |    | 18                                                                                                            | 47,XY,+8[3]/46,XY [12].nuc ish cen8(CEP8x3)[14/100]                                                                                                                                                              |     |  |
| FA12 | M | 12 | FANCA     | no      | no | 23 | 23 | ≥5 to <20% (BM) or ≥2 to <20% (PB) | FA-MDS-EB     | 19 | 47,XY,+8[11]/46,XY[9].nuc ish 3q26(EV11x2)[100/100],cen7(CEP7x2),7q31(D7S486x2)[100/100],cen8(CEP8x3)[43/100] | 1q+; 7q-                                                                                                                                                                                                         | yes |  |
|      |   |    |           |         |    |    |    |                                    |               |    | 19                                                                                                            | 47,XY,+8[4]/46,XY[13].nuc ish cen8(CEP8x3)[17/100]                                                                                                                                                               |     |  |
|      |   |    |           |         |    |    |    |                                    |               |    | 20                                                                                                            | 47,XY,+8[4]/46,XY[16].nuc ish cen8(CEP8x3)[27/100]                                                                                                                                                               |     |  |
|      |   |    |           |         |    |    |    |                                    |               |    | 20                                                                                                            | 47,XY,+8[3]/46,XY[12].nuc ish cen8(CEP8x3)[12/100]                                                                                                                                                               |     |  |
|      |   |    |           |         |    |    |    |                                    |               |    | 21                                                                                                            | 47,XY,+8[6]/46,XY[9].nuc ish 3q26(EV11x2)[99/100],cen7(CEP7x2), 7q31(D7S486x2)[93/100],cen8(CEP8x3)[42/100]                                                                                                      |     |  |
|      |   |    |           |         |    |    |    |                                    |               |    | 21                                                                                                            | 47,XY,+8[6]/46,XY[4].nuc ish cen7(CEP7x2),7q31(D7S486x2)[96/100],cen8(CEP8x3)[24/100]                                                                                                                            |     |  |
|      |   |    |           |         |    |    |    |                                    |               |    | 22                                                                                                            | 46,XY[16].nuc ish 3q26(EV11x2)[100/100],cen7(CEP7x2),7q31(D7S486x2)[96/100],21q22 (AML1x2)[100/100]                                                                                                              |     |  |
|      |   |    |           |         |    |    |    |                                    |               |    | 23                                                                                                            | 46,XY,der(7)t(7)(q10)del(7)(q21q35),der(13)t(1;13)(q12;p11)[6]/46,XY[9].nuc ish 1p32(CKS1Bx2),1q21(CDKN2C3)[13/100],cen7(CEP7x2),7q31(D7S486x1)[13/100],cen8(CEP8x2)[95/100]                                     |     |  |
| FA13 | M | 2  | FANCA     | yes (9) | no | 20 | 8  | <5% (BM) and <2% (PB)              | FA-MDS-non EB | 9  | 45,XY,-7[16].nuc ish cen7(CEP7x1)[70/100]                                                                     |                                                                                                                                                                                                                  |     |  |
|      |   |    |           |         |    |    |    |                                    |               |    | 9                                                                                                             | 45,XY,-7[15]                                                                                                                                                                                                     |     |  |
|      |   |    |           |         |    |    |    |                                    |               |    | 9                                                                                                             | no metaphases.nuc ish cen7(CEP7x2)[100]                                                                                                                                                                          |     |  |
|      |   |    |           |         |    |    |    |                                    |               |    | 10                                                                                                            | //46,XX[15].nuc ish cen7(CEP7x2)[100]                                                                                                                                                                            |     |  |
|      |   |    |           |         |    |    |    |                                    |               |    | 10                                                                                                            | //46,XX[15].nuc ish cen7(CEP7x2)[100]                                                                                                                                                                            |     |  |

|      |   |    |        |          |          |    |   |                       |        |    |                                                                                                                                                                       |     |      |
|------|---|----|--------|----------|----------|----|---|-----------------------|--------|----|-----------------------------------------------------------------------------------------------------------------------------------------------------------------------|-----|------|
|      |   |    |        |          |          |    |   |                       |        | 10 | //46,XX[15].nuc ish cen7(CEP7x2)[100]                                                                                                                                 |     |      |
|      |   |    |        |          |          |    |   |                       |        | 10 | //46,XX[15].nuc ish cen7(CEP7x2),7q31(D7S486x2)[100]                                                                                                                  |     |      |
|      |   |    |        |          |          |    |   |                       |        | 10 | //46,XX.nuc ish cen7(CEP7x2),7q31(D7S486x2),cen8(CEP8x2)[100]                                                                                                         |     |      |
|      |   |    |        |          |          |    |   |                       |        | 15 | //46,XX[20].nuc ish cen7 (CEP7x2)[100]                                                                                                                                |     |      |
|      |   |    |        |          |          |    |   |                       |        | 19 | //46,XX[20].nuc ish cen7(CEP7x2)[100]                                                                                                                                 |     |      |
|      |   |    |        |          |          |    |   |                       |        | 4  | 46,XX[15]                                                                                                                                                             |     |      |
|      |   |    |        |          |          |    |   |                       |        | 5  | 46,XX[15].nuc ish cen7(CEP7x2),7q31(D7S486x2),cen8(CEP8x2)[100]                                                                                                       |     |      |
|      |   |    |        |          |          |    |   |                       |        | 6  | 46,XX[1].nuc ish 3q26(EV11x2),cen7(CEP7x2),7q31(D7S486x2),cen8(CEP8x2)[100]                                                                                           |     |      |
|      |   |    |        |          |          |    |   |                       |        | 8  | 46,XX[1].nuc ish cen7(CEP7x2),7q31(D7S486x2),cen8(CEP8x2)[100]                                                                                                        |     |      |
|      |   |    |        |          |          |    |   |                       |        | 9  | 46,XX[20]                                                                                                                                                             |     |      |
|      |   |    |        |          |          |    |   |                       |        | 10 | 46,XX[5].nuc ish 3q26(EV11x2),cen7(CEP7x2),7q31(D7S486x2),cen8(CEP8x2)[100]                                                                                           |     |      |
| FA14 | F | 5  | FANCA  | no       | no       | 17 | - | <5% (BM) and <2% (PB) | FA-BMF | 11 | 46,XX[13].nuc ish 5p15.2(5p15.2x2),5q31(EGR1x2),cen7(CEP7x2),7q31(D7S486x2),cen8(CEP8x2),17p13.1(P53x2),20q12(D20S108x2),3q26(EV11x2)[100]                            | -   | -    |
|      |   |    |        |          |          |    |   |                       |        | 12 | 46,XX[9].nuc ish 3q26(EV11x2),cen7(CEP7x2),7q31(D7S486x2),cen8(CEP8x2)[100]                                                                                           |     |      |
|      |   |    |        |          |          |    |   |                       |        | 13 | no metaphases.nuc ish cen7(CEP7x2),7q31(D7S486x2),cen8(CEP8x2)[100]                                                                                                   |     |      |
|      |   |    |        |          |          |    |   |                       |        | 14 | 46,XX[15].nuc ish 3q26(EV11x2),cen7(CEP7x2),7q31(D7S486x2),cen8(CEP8x2)[100]                                                                                          |     |      |
|      |   |    |        |          |          |    |   |                       |        | 15 | 46,XX[15].nuc ish 3q26(EV11x2)[98/100],cen7(CEP7x2),7q31(D7S486x2)[100/100],cen8(CEP8x2)[97/100]                                                                      |     |      |
|      |   |    |        |          |          |    |   |                       |        | 16 | 46,XX[15].nuc ish 3q26(EV11x2)[100/100],cen7(CEP7x2),7q31(D7S486x2)[100/100],cen8(CEP8x2)[100/100]                                                                    |     |      |
|      |   |    |        |          |          |    |   |                       |        | 17 | 46,XX,inc[4].nuc ish 3q26(EV11x2)[100/100],cen7(CEP7x2),7q31(D7S486x2)[98/100],cen8(CEP8x2)[98/100],21q22(AML1x2)[100/100]                                            |     |      |
| FA15 | F | 11 | FANCA  | yes (11) | no       | 13 | - | <5% (BM) and <2% (PB) | FA-BMF | 11 | 46,XX[15].nuc ish cen7(CEP7x2),7q31(D7S486x2),cen8(CEP8x2),3q26(EV11x2)[100]                                                                                          | -   | -    |
|      |   |    |        |          |          |    |   |                       |        | 11 | 46,XX[15].nuc ish 3q26(EV11x2),cen7(CEP7x2),7q31(D7S486x2),cen8(CEP8x2),21q22(AML1x2)[100]                                                                            |     |      |
| FA19 | M | 16 | FANCA  | no       | no       | 25 | - | <5% (BM) and <2% (PB) | FA-BMF | 20 | 46,XY,inc[2].nuc ish 3q26(EV11x2),cen7(CEP7x2),7q31(D7S486x2),cen8(CEP8x2)[100]                                                                                       | -   | -    |
| FA20 | M | 4  | FANCA  | no       | no       | 6  | - | <5% (BM) and <2% (PB) | FA-BMF | 5  | 46,XY[7].nuc ish cen7(CEP7x2),cen8(CEP8x2)[100]                                                                                                                       | -   | -    |
|      |   |    |        |          |          |    |   |                       |        | 5  | 46,XY[20].21q22(AML1x2)[100/100]                                                                                                                                      |     |      |
|      |   |    |        |          |          |    |   |                       |        | 6  | 46,XY[15].nuc ish 3q26(EV11x2),cen7(CEP7x2),7q31(D7S486x2),cen8(CEP8x2)[100]                                                                                          |     |      |
| FA21 | M | 2  | FANCD2 | yes (3)  | no       | 17 | - | <5% (BM) and <2% (PB) | FA-BMF | 3  | 46,XY[15]                                                                                                                                                             | -   | -    |
|      |   |    |        |          |          |    |   |                       |        | 12 | 46,XY[20]                                                                                                                                                             |     |      |
|      |   |    |        |          |          |    |   |                       |        | 14 | 46,XY[1].nuc ish cen7(CEP7x2),7q31(D7S486x2),cen8(CEP8x2)[100]                                                                                                        |     |      |
|      |   |    |        |          |          |    |   |                       |        | 15 | 46,XY,der(22)t(1:22)(q12;p13)[10]/46,XY[5].nuc ish 1p36(SRDx2),1q21(1q21x3)[79/100]                                                                                   |     |      |
|      |   |    |        |          |          |    |   |                       |        | 16 | 46,XY,der(22)t(1:22)(q12;p13),inc[14]/46,XY[2].nuc ish 1p36(SRDx2),1q21(1q21x3)[13/100]                                                                               |     |      |
|      |   |    |        |          |          |    |   |                       |        | 16 | 46,XY,der(22)t(1:22)(q12;p13)[16]/46,idem,?del(12)(p12p13)[2]/46,XY[2].nuc ish 1p36(SRDx2),1q21(1q21x3)[40/100],12p13(TELx2)[100]                                     |     |      |
| FA22 | M | 12 | FANCA  | no       | no       | 21 | - | <5% (BM) and <2% (PB) | FA-AIP | 17 | 46,XY,der(22)t(1:22)(q12;p13)[5]/46,XY[8].nuc ish 1p36(SRDx2),1q21(1q21x3)[48/100]                                                                                    | 1q+ | ?yes |
|      |   |    |        |          |          |    |   |                       |        | 18 | 46,XY,der(22)t(1:22)(q12;p13)[13]/46,XY[2].nuc ish 1p36(SRDx2),1q21(1q21x3)[80/100]                                                                                   |     |      |
|      |   |    |        |          |          |    |   |                       |        | 18 | 46,XY,der(22)t(1:22)(q12;p13)[2].nuc ish cen7(CEP7x2),7q31(D7S486x2)[100/100],cen8(CEP8x2)[100/100],3q26(EV11x2)[100/100],1p36(SRDx2),1q21(1q21x3)[52/100]            |     |      |
|      |   |    |        |          |          |    |   |                       |        | 20 | 46,XY,der(22)t(1:22)(q12;p13)[1].nuc ish 1p36(SRDx2),1q21(1q21x3)[80/100]                                                                                             |     |      |
|      |   |    |        |          |          |    |   |                       |        | 20 | no metaphases.nuc ish 1p36(SRDx2),1q21(1q21x2)[100/100],21q22(AML1x2)[99/100]                                                                                         |     |      |
|      |   |    |        |          |          |    |   |                       |        | 20 | 46,XY,der(22)t(1:22)(q12;p13)[1].nuc ish 1p36(SRDx2),1q21(1q21x3)[58/100]                                                                                             |     |      |
|      |   |    |        |          |          |    |   |                       |        | 21 | 46,XY,der(22)t(1:22)(q12;p13)[1].nuc ish 1p36(SRDx2),1q21(1q21x3)[45/100]                                                                                             |     |      |
| FA23 | M | 4  | FANCB  | no       | no       | 7  | - | <5% (BM) and <2% (PB) | FA-BMF | 7  | 46,XY[20].nuc ish 21q22(AML1x2)[96/100]                                                                                                                               | -   | -    |
|      |   |    |        |          |          |    |   |                       |        | 4  | 46,XX[20].nuc ish cen7(CEP7x2),7q31(D7S486x2),cen8(CEP8x2)[100]                                                                                                       |     |      |
|      |   |    |        |          |          |    |   |                       |        | 5  | 46,XX[20].nuc ish cen7(CEP7x2),7q31(D7S486x2),cen8(CEP8x2)[100]                                                                                                       |     |      |
|      |   |    |        |          |          |    |   |                       |        | 7  | 46,XX[11]                                                                                                                                                             |     |      |
| FA25 | F | 4  | FANCG  | yes (9)  | no       | 9  | - | <5% (BM) and <2% (PB) | FA-AIP | 8  | 46,XX,?del(6)(p23),inc[3]/46,XX,inc[12].nuc ish 3q26(EV11x2)[93/100],cen7(CEP7x2),7q31(D7S486x2)[99/100],cen8(CEP8x2)[100/100]                                        | 6p- | no   |
|      |   |    |        |          |          |    |   |                       |        | 8  | 46,XX,del(6)(p23),inc[3]/46,XX[18]                                                                                                                                    |     |      |
|      |   |    |        |          |          |    |   |                       |        | 8  | 46,XX,inc[10].nuc ish 3q26(EV11x2)[100/100],cen7(CEP7x2),7q31(D7S486x2)[97/100],cen8(CEP8x2)[98/100],21q22(AML1x2)[100/100]                                           |     |      |
| FA26 | F | 14 | FANCA  | yes (18) | yes (18) | 18 | - | <5% (BM) and <2% (PB) | FA-AIP | 18 | 46,XX,+1,der(1:15)(q10;q10)[5]/47,XX,+del(1)(p22p36)[4]/46,XX[6].nuc ish 1p36(SRDx2),1q21(1q21x3)[60/100],cen7(CEP7x2),7q31(D7S486x2)[100/100],21q22(AML1x2)[100/100] | 1q+ | no   |

|      |   |    |           |          |          |    |    |                       |        |    |                                                                                                                                                                                                                          |          |        |
|------|---|----|-----------|----------|----------|----|----|-----------------------|--------|----|--------------------------------------------------------------------------------------------------------------------------------------------------------------------------------------------------------------------------|----------|--------|
| FA27 | F | 11 | FANCC     | yes (12) | no       | 17 | 11 | ≥20% (PB or BM)       | FA-AML | 11 | 46,XX,der(7)t(1;7)(q21;q31),der(16)t(9;16)(p12;p12)[20].nuc ish cen7(CEP7x2), 7q31(D7S486x2)[100/100],8q22(ETOx2),21q22(AML1x2)[100/100],9p21(P16x3),cen9(CEP9x2)[87/100], 11q23(MLLx2)[100/100],21q22 (AML1x2)[100/100] | 1q+;7q-  | yes *1 |
|      |   |    |           |          |          |    |    |                       |        | 11 | 46,XX,der(7)t(1;7)(q21;q31)[2]/46,idem,der(16)t(9;16)(p12;p12)[18]/46,XX[2].nuc ish 9p21(P16x3), cen9(CEP9x2)[77/100],11q23(MLLx2)[100/100],12p13(TELx2)[100/100],21q22 (AML1x2)[100/100]                                |          |        |
|      |   |    |           |          |          |    |    |                       |        | 13 | 46,XX[25].nuc ish 9p21(P16x2),cen9(CEP9x2)[100]                                                                                                                                                                          |          |        |
| FA28 | M | 8  | not known | yes (9)  | no       | 13 | -  | <5% (BM) and <2% (PB) | FA-BMF | 9  | 46,XY[10].nuc ish 3q26(EV11x2),cen7(CEP7x2),7q31(D7S486x2)[100]                                                                                                                                                          | -        | -      |
| FA29 | M | 16 | FANCL     | yes (16) | no       | 16 | -  | <5% (BM) and <2% (PB) | FA-BMF | 16 | 46,XY[20].nuc ish cen7(CEP7x2),7q31(D7S486x2),cen8(CEP8x2),21q22(AML1x2)[100]                                                                                                                                            | -        | -      |
| FA30 | F | 4  | FANCA     | yes (7)  | no       | 12 | -  | <5% (BM) and <2% (PB) | FA-BMF | 3  | 46,XX[20]                                                                                                                                                                                                                | -        | -      |
|      |   |    |           |          |          |    |    |                       |        | 4  | 46,XX[12].nuc ish cen7(CEP7x2),7q31(D7S486x2),cen8(CEP8x2)[100]                                                                                                                                                          |          |        |
|      |   |    |           |          |          |    |    |                       |        | 4  | 46,XX[15].nuc ish 3q26(EV11x2),5p15.2(5p15.2x2),5q31(EGR1x2),cen7(CEP7x2),7q31(D7S486x2), cen8(CEP8x2)[100]                                                                                                              |          |        |
| FA31 | F | 4  | FANCA     | yes (9)  | no       | 9  | -  | <5% (BM) and <2% (PB) | FA-BMF | 5  | 46,XX[15].nuc ish 5p15.2(5p15.2x2),5q31(EGR1x2)100, cen7(CEP7x2),7q31(D7S486x2),cen8(CEP8x2)[100]                                                                                                                        | -        | -      |
|      |   |    |           |          |          |    |    |                       |        | 6  | 46,XX[1].nuc ish 3q26(EV11x2),cen7(CEP7x2),7q31(D7S486x2),cen8(CEP8x2)[100]                                                                                                                                              |          |        |
|      |   |    |           |          |          |    |    |                       |        | 7  | 46,XX[15].nuc ish 3q26(EV11x2),cen7(CEP7x2),7q31(D7S486x2),cen8(CEP8x2)[100]                                                                                                                                             |          |        |
|      |   |    |           |          |          |    |    |                       |        | 8  | 46,XX[5]                                                                                                                                                                                                                 |          |        |
|      |   |    |           |          |          |    |    |                       |        | 9  | 46,XX[15].nuc ish 21q22(AML1x2)[98/100]                                                                                                                                                                                  |          |        |
| FA32 | M | 10 | FANCA     | yes (11) | no       | 15 | -  | <5% (BM) and <2% (PB) | FA-BMF | 10 | 46,XY[15].nuc ish 21q22(AML1x2)[94/100]                                                                                                                                                                                  | -        | -      |
|      |   |    |           |          |          |    |    |                       |        | 5  | 46,XX[15].nuc ish cen7(CEP7x2),7q31(D7S486x2),cen8(CEP8x2),3q26(EV11x2)[100]                                                                                                                                             |          |        |
|      |   |    |           |          |          |    |    |                       |        | 6  | 46,XX[19].nuc ish cen7(CEP7x2),7q31(D7S486x2),cen8(CEP8x2),3q26(EV11x2)[100]                                                                                                                                             |          |        |
|      |   |    |           |          |          |    |    |                       |        | 8  | 46,XX[12].nuc ish 3q26(EV11x2),cen7(CEP7x2),7q31(D7S486x2),cen8(CEP8x2)[100]                                                                                                                                             |          |        |
|      |   |    |           |          |          |    |    |                       |        | 9  | 46,XX[21]                                                                                                                                                                                                                |          |        |
|      |   |    |           |          |          |    |    |                       |        | 10 | 46,XX[16].nuc ish 3q26(EV11x2),cen7(CEP7x2),7q31(D7S486x2),cen8(CEP8x2)[100]                                                                                                                                             |          |        |
| FA34 | F | 0  | FANCL     | no       | no       | 16 | -  | <5% (BM) and <2% (PB) | FA-BMF | 11 | 46,XX[15].nuc ish cen7(CEP7x2),7q31(D7S486x2),cen8(CEP8x2),3q26(EV11x2)[100]                                                                                                                                             | -        | -      |
|      |   |    |           |          |          |    |    |                       |        | 14 | 46,XX[15].nuc ish 3q26(EV11x2)[100/100], cen7(CEP7x2),7q31(D7S486x2)[98/100],cen8(CEP8x2)[96/100]                                                                                                                        |          |        |
|      |   |    |           |          |          |    |    |                       |        | 15 | 46,XX[16].nuc ish 3q26(EV11x2)[98/100], cen7(CEP7x2),7q31(D7S486x2)[99/100],cen8(CEP8x2)[100/100]                                                                                                                        |          |        |
|      |   |    |           |          |          |    |    |                       |        | 16 | 46,XX[15].nuc ish 3q26(EV11x2)[100/100],cen7(CEP7x2),7q31(D7S486x2)[98/100], cen8(CEP8x2)[100/100],21q22(AML1x2)[99/100]                                                                                                 |          |        |
|      |   |    |           |          |          |    |    |                       |        | 10 | 46,XY[15].nuc ish 3q26(EV11x2),cen7(CEP7x2),7q31(D7S486x2),cen8(CEP8x2)[100]                                                                                                                                             |          |        |
|      |   |    |           |          |          |    |    |                       |        | 11 | 46,XY[20].nuc ish 3q26(EV11x2),cen7(CEP7x2),7q31(D7S486x2),cen8(CEP8x2)[100]                                                                                                                                             |          |        |
|      |   |    |           |          |          |    |    |                       |        | 13 | 46,XY[15].nuc ish 3q26(EV11x2)[96/100], cen7(CEP7x2),7q31(D7S486x2)[97/100],cen8(CEP8x2)[97/100]                                                                                                                         |          |        |
| FA35 | M | 10 | FANCA     | yes (14) | no       | 14 | -  | <5% (BM) and <2% (PB) | FA-AIP | 14 | 46,XY,del(7)(p12)[4]/46,XY[16].nuc ish 3q26(EV11x2)[100/100], cen7(CEP7x2),7q31(D7S486x2)[99/100],cen8(CEP8x2)[99/100]                                                                                                   | 7p-      | no     |
|      |   |    |           |          |          |    |    |                       |        | 14 | 46,XY,r(7)(p?q)[2]/46,XY,del(7)(p12)[2]/46,XY,dup(19)(q11q13)[2]/46,XY[16].ish r(7)(D7Z1+,D7S5486+)[2].nuc ish 3q26(EV11x2)[98/100], cen7(CEP7x2),7q31(D7S486x2)[98/100],cen8(CEP8x2)[97/100]                            |          |        |
|      |   |    |           |          |          |    |    |                       |        | 14 | 46,XY,add(19)(q13)[2]/46,XY,r(7)(p?q)[1]/46,XY[13].nuc ish cen7(CEP7x2),7q31(D7S486x2)[97/100], 21q22(AML1x2)[100/100]                                                                                                   |          |        |
|      |   |    |           |          |          |    |    |                       |        | 10 | 46,XX,inc[15]                                                                                                                                                                                                            |          |        |
| FA36 | F | 5  | FANCA     | no       | no       | 15 | -  | <5% (BM) and <2% (PB) | FA-BMF | 11 | 46,XX[7].nuc ish cen7(CEP7x2),7q31(D7S486x2),cen8(CEP8x2),3q26(EV11x2)[100]                                                                                                                                              | -        | -      |
|      |   |    |           |          |          |    |    |                       |        | 14 | 46,XX[15].nuc ish 3q26(EV11x2)[99/100],ceb7(CEP7x2),7q31(D7S486x2)[100/100], cen8(CEP8x2)[99/100],21q22(AML1x2)[100/100]                                                                                                 |          |        |
| FA39 | M | 6  | not known | no       | yes (12) | 12 | 12 | ≥20% (PB or BM)       | FA-AML | 6  | 46,XY[20].nuc ish cenX(CEPx1),cenY(CEPYx1)[100]                                                                                                                                                                          | 3q+; 7q- | no     |
|      |   |    |           |          |          |    |    |                       |        | 12 | 46,XY,del(7)(q21q33),der(19)t(3;19)(q24;p13)[15].nuc ish 3q26(EV11x3)[56/100], cen7(CEP7x2),7q31(D7S486x1)[80/100],cen8(CEP8x2)[100/100]                                                                                 |          |        |
| FA40 | F | 6  | FANCA     | yes (8)  | no       | 10 | -  | <5% (BM) and <2% (PB) | FA-BMF | 6  | 46,XX[15].nuc ish cen7(CEP7x2),7q31(D7S486x2),cen8(CEP8x2),3q26(EV11x2)[100]                                                                                                                                             | -        | -      |
|      |   |    |           |          |          |    |    |                       |        | 7  | 46,XX[21].nuc ish 3q26(EV11x2),cen7(CEP7x2),7q31(D7S486x2),cen8(CEP8x2)[100]                                                                                                                                             |          |        |
|      |   |    |           |          |          |    |    |                       |        | 8  | 46,XX[20].nuc ish cen7(CEP7x2),7q31(D7S486x2),cen8(CEP8x2),21q22(AML1x2)[100]                                                                                                                                            |          |        |

|      |   |         |        |          |          |    |    |                       |               |    |                                                                                                                                                                                             |           |        |
|------|---|---------|--------|----------|----------|----|----|-----------------------|---------------|----|---------------------------------------------------------------------------------------------------------------------------------------------------------------------------------------------|-----------|--------|
| FA41 | F | 5       | FANCD2 | yes (6)  | no       | 10 | -  | <5% (BM) and <2% (PB) | FA-BMF        | 5  | 46,XX[15].nuc ish cen7(CEP7x2),7q31(D7S486x2),cen8(CEP8x2)[100]                                                                                                                             | -         | -      |
|      |   |         |        |          |          |    |    |                       |               | 5  | 46,XX[15].nuc ish cen7(CEP7x2),7q31(D7S486x2),cen8(CEP8x2), 3q26(EV11x2)[100],21q22(AML1x2)[97/100]                                                                                         |           |        |
| FA42 | M | 15      | FANCT  | no       | no       | 18 | -  | <5% (BM) and <2% (PB) | FA-BMF        | 17 | 46,XY[15].nuc ish 3q26(EV11x2),cen7(CEP7x2),7q31(D7S486x2),cen8(CEP8x2)[100]                                                                                                                | -         | -      |
|      |   |         |        |          |          |    |    |                       |               | 18 | 46,XY,inc[15].nuc ish 3q26(EV11x2)[99/100], cen7(CEP7x2),7q31(D7S486x2)[100/100],cen8(CEP8x2)[97/100]                                                                                       |           |        |
| FA43 | F | 10      | FANCC  | yes (42) | yes (43) | 43 | 42 | ≥20% (PB or BM)       | FA-AML        | 42 | 46,XX,del(6)(p22),der(7)t(3;7)(p22;p21)t(1;7)(p21;q31),t(15;18)(q24;q22)[13]/47,idem,+13[2].nuc ish 3q26(EV11x2),cen7(CEP7x2),7q31(D7S486x2),11q23(MLLx2)[100]                              | 6p-; 7q-  | yes *2 |
| FA44 | M | 9       | FANCA  | yes (15) | no       | 17 | -  | <5% (BM) and <2% (PB) | FA-BMF        | 14 | 46,XY[15].nuc ish cen7(CEP7x2),7q31(D7S486x2),cen8(CEP8x2),3q26(EV11x2),21q22(AML1x2)[100]                                                                                                  | -         | -      |
|      |   |         |        |          |          |    |    |                       |               | 13 | 46,XX[15].nuc ish cen7(CEP7x2),7q31(D7S486x2),cen8(CEP8x2),3q26(EV11x2)[100]                                                                                                                |           |        |
| FA45 | F | 11      | FANCA  | yes (16) | no       | 16 | -  | <5% (BM) and <2% (PB) | FA-AIP        | 15 | 46,XX,del(11)(q14q23)[14]/46,XX[6].nuc ish 3q26(EV11x2)[98/100],cen7(CEP7x2),7q31(D7S486x2)[100/100],cen8(CEP8x2)[98/100],11q23(MLLx1)[64/100]                                              | 11q-; +21 | yes    |
|      |   |         |        |          |          |    |    |                       |               | 16 | 46,XX,del(11)(q14q23)[3]/47,idem,+21[3]/46,XX[14].nuc ish 3q26(EV11x2)[100/100],cen7(CEP7x2),7q31(D7S486x2)[100/100],cen8(CEP8x2)[98x2][98/100],11q23(MLLx1)[73/100],21q22(AML1x2)[100/100] |           |        |
| FA46 | M | 4       | FANCA  | no       | no       | 19 | -  | <5% (BM) and <2% (PB) | FA-AIP        | 10 | 46,XY[17].nuc ish cen7(CEP7x2),7q31(D7S486x2),cen8(CEP8x2)[100]                                                                                                                             | -         | *3 -   |
|      |   |         |        |          |          |    |    |                       |               | 11 | 46,XY[16].nuc ish cen7(CEP7x2),7q31(D7S486x2),cen8(CEP8x2)[100]                                                                                                                             |           |        |
| FA47 | F | 13      | FANCA  | yes (13) | yes (14) | 14 | -  | <5% (BM) and <2% (PB) | FA-AIP        | 13 | 46,XX,der(6)t(1;6)(q21;p22)[10]/46,XX[10].nuc ish 1p36(SRDx2),1q21(1q21x3)[29/100],cen7(CEP7x2),7q31(D7S486x2)[100/100],cen8(CEP8x2)[100/100],21q22(AML1x2)[99/100]                         | 1q+; 6p-  | no *4  |
|      |   |         |        |          |          |    |    |                       |               | 13 | 46,XX,der(6)t(1;6)(q21;p22)[6]/46,XX[14].nuc ish 1p36(SRDx2),1q21(1q21x2)[100]                                                                                                              |           |        |
| FA48 | F | 2       | FANCA  | no       | no       | 7  | -  | <5% (BM) and <2% (PB) | FA-BMF        | 4  | 46,XY[15].nuc ish 3q26(EV11x2),cen7(CEP7x2),7q31(D7S486x2),cen8(CEP8x2),21q22(AML1x2)[100]                                                                                                  | -         | -      |
|      |   |         |        |          |          |    |    |                       |               | 5  | 46,XY[15].nuc ish 3q26(EV11x2),cen7(CEP7x2),7q31(D7S486x2),cen8(CEP8x2)[100]                                                                                                                |           |        |
| FA49 | F | 2       | FANCA  | yes (6)  | yes (6)  | 12 | -  | <5% (BM) and <2% (PB) | FA-BMF        | 6  | no metaphases.nuc ish cen7(CEP7x2),7q31(D7S486x2)[99/100],cen8(CEP8x2)[97/100]                                                                                                              | -         | -      |
|      |   |         |        |          |          |    |    |                       |               | 2  | 46,XX[20].nuc ish 21q22(AML1x2)[100]                                                                                                                                                        |           |        |
| FA50 | M | 1       | FANCA  | no       | no       | 21 | -  | <5% (BM) and <2% (PB) | FA-BMF        | 2  | 46,XX[20].nuc ish 3q26(EV11x2),cen7(CEP7x2),7q31(D7S486x2),cen8(CEP8x2)[100]                                                                                                                | -         | -      |
|      |   |         |        |          |          |    |    |                       |               | 2  | 46,XX[20].nuc ish cen7(CEP7x2),7q31(D7S486x2),cen8(CEP8x2)[100]                                                                                                                             |           |        |
| FA51 | F | 7       | FANCA  | no       | no       | 11 | -  | <5% (BM) and <2% (PB) | FA-BMF        | 6  | 46,XX[15].nuc ish cen7(CEP7x2),7q31(D7S486x2),cen8(CEP8x2),21q22(AML1x2)[100]                                                                                                               | -         | -      |
|      |   |         |        |          |          |    |    |                       |               | 16 | 46,XY[15].nuc ish 3q26(EV11x2),cen7(CEP7x2),7q31(D7S486x2),cen8(CEP8x2)[100]                                                                                                                |           |        |
| FA52 | M | 10      | FANCC  | no       | no       | 23 | -  | <5% (BM) and <2% (PB) | FA-BMF        | 17 | 46,XY[15].nuc ish cen7(CEP7x2),7q31(D7S486x2),cen8(CEP8x2)[100]                                                                                                                             | -         | -      |
|      |   |         |        |          |          |    |    |                       |               | 18 | no metaphases.nuc ish cen7(CEP7x2),7q31(D7S486x2),cen8(CEP8x2),3q26(EV11x2),5p15.2(5p15.2x2),5q31(EGR1x2)[100]                                                                              |           |        |
| FA53 | M | ?       | FANCA  | ?        | ?        | 15 | -  | <5% (BM) and <2% (PB) | FA-BMF        | 19 | 46,XY,inc[7].nuc ish cen7(CEP7x2),7q31(D7S486x2),cen8(CEP8x2)[100]                                                                                                                          | -         | -      |
|      |   |         |        |          |          |    |    |                       |               | 21 | 46,XY[15]                                                                                                                                                                                   |           |        |
| FA54 | F | 1 month | FANCL  | yes (4)  | no       | 4  | 4  | <5% (BM) and <2% (PB) | FA-MDS-non EB | 7  | 46,XX[22].nuc ish cen7(CEP7x2),7q31(D7S486x2),cen8(CEP8x2)[100]                                                                                                                             | 3q+; 7q-  | no     |
|      |   |         |        |          |          |    |    |                       |               | 7  | 46,XX[13].nuc ish cen7(CEP7x2),7q31(D7S486x2),cen8(CEP8x2)[100]                                                                                                                             |           |        |
| FA55 | M | ?       | FANCA  | ?        | ?        | 15 | -  | <5% (BM) and <2% (PB) | FA-BMF        | 8  | 46,XX[20].nuc ish 3q26(EV11x2),cen7(CEP7x2),7q31(D7S486x2),cen8(CEP8x2)[100]                                                                                                                | -         | -      |
|      |   |         |        |          |          |    |    |                       |               | 9  | 46,XX[15].nuc ish 3q26(EV11x2)[98/100],cen7(CEP7x2),7q31(D7S486x2)[99/100],cen8(CEP8x2)[98/100],21q22(AML1x2)[100/100]                                                                      |           |        |
| FA56 | M | 10      | FANCC  | no       | no       | 23 | -  | <5% (BM) and <2% (PB) | FA-BMF        | 10 | 46,XX,inc[2].nuc ish 1p36(SRDx2),1q21(1q21x2)[98/100],3q26(EV11x2)[100/100],cen7(CEP7x2),7q31(D7S486x2)[99/100],cen8(CEP8x2)[99/100]                                                        | -         | -      |
|      |   |         |        |          |          |    |    |                       |               | 11 | 46,XX,inc[4].nuc ish 3q26(EV11x2)[100/100]                                                                                                                                                  |           |        |
| FA57 | M | ?       | FANCA  | ?        | ?        | 15 | -  | <5% (BM) and <2% (PB) | FA-BMF        | 10 | 46,XY[20]                                                                                                                                                                                   | -         | -      |
|      |   |         |        |          |          |    |    |                       |               | 10 | 46,XY[15]                                                                                                                                                                                   |           |        |
| FA58 | M | ?       | FANCA  | ?        | ?        | 15 | -  | <5% (BM) and <2% (PB) | FA-BMF        | 10 | 46,XY[8].nuc ish cen7(CEP7x2),7q31(D7S522x2)[100]                                                                                                                                           | -         | -      |
|      |   |         |        |          |          |    |    |                       |               | 11 | 46,XY[20]                                                                                                                                                                                   |           |        |
| FA59 | F | 1 month | FANCL  | yes (4)  | no       | 4  | 4  | <5% (BM) and <2% (PB) | FA-MDS-non EB | 15 | 46,XY[20].nuc ish 3q26(EV11x2),cen7(CEP7x2),7q31(D7S486x2),cen8(CEP8x2)[100]                                                                                                                | 3q+; 7q-  | no     |
|      |   |         |        |          |          |    |    |                       |               | 4  | 46,XX,add(7)(q21),add(18)(p11)[15].nuc ish cen7(CEP7x2),7q31(D7S486x1)[92/100],cen8(CEP8x2)[100/100]                                                                                        |           |        |
| FA60 | F | 1 month | FANCL  | yes (4)  | no       | 4  | 4  | <5% (BM) and <2% (PB) | FA-MDS-non EB | 4  | 46,XX,der(7)t(3;7)(q13;q11),add(18)(p11)[15].nuc ish 3q26(EV11x3)[46/100],cen7(CEP7x2),7q31(D7S486x1)[94/100]                                                                               | 3q+; 7q-  | no     |
|      |   |         |        |          |          |    |    |                       |               | 4  | nuc ish 3q26(EV11x3)[46/100],cen7(CEP7x2),7q31(D7S486x1)[94/100]                                                                                                                            |           |        |

|      |   |    |           |          |          |    |    |                       |               |    |                                                                                                                                                                                                                                                                             |                                       |     |
|------|---|----|-----------|----------|----------|----|----|-----------------------|---------------|----|-----------------------------------------------------------------------------------------------------------------------------------------------------------------------------------------------------------------------------------------------------------------------------|---------------------------------------|-----|
| FA55 | F | 4  | FANCC     | yes (5)  | no       | 5  | -  | <5% (BM) and <2% (PB) | FA-BMF        | 4  | 46,XX[17].nuc ish 3q26(EV11x2),cen7(CEP7x2),7q31(D7S486x2),cen8(CEP8x2),21q22(AML1x2)[100]                                                                                                                                                                                  |                                       |     |
|      |   |    |           |          |          |    |    |                       |               | 4  | 46,XX,inc[5].nuc ish cenX(CEPXx2),3q26(EV11x2), cen7(CEP7x2),7q31(D7S486x2),cen8(CEP8x2)[100]                                                                                                                                                                               | -                                     | -   |
|      |   |    |           |          |          |    |    |                       |               | 5  | no metaphases.nuc ish 3q26(EV11x2),cen7(CEP7x2),7q31(D7S486x2),cen8(CEP8x2)[100]                                                                                                                                                                                            |                                       |     |
|      |   |    |           |          |          |    |    |                       |               | 5  | 46,XY,inc[3].nuc ish 3q26(EV11x2),cen7(CEP7x2),7q31(D7S486x2), cen8(CEP8x2),21q22(RUNX1x2)[100]                                                                                                                                                                             |                                       |     |
| FA56 | M | 6  | not known | yes (7)  | no       | 9  | -  | <5% (BM) and <2% (PB) | FA-BMF        | 7  | 46,XY,inc[4].nuc ish 3q26(EV11x2),cen7(CEP7x2),7q31(D7S486x2),cen8(CEP8x2)[100]                                                                                                                                                                                             | -                                     | -   |
|      |   |    |           |          |          |    |    |                       |               | 7  | 46,XX[10].nuc ish 3q26(EV11x3),cen7(CEP7x2),7q31(D7S486x2),cen8(CEP8x2)[100]                                                                                                                                                                                                |                                       |     |
|      |   |    |           |          |          |    |    |                       |               | 7  | 46,XY[5].nuc ish 3q26(EV11x2),cen7(CEP7x2),7q31(D7S486x2),cen8(CEP8x2),21q22(AML1x2)[100]                                                                                                                                                                                   |                                       |     |
| FA57 | M | 4  | FANCD2    | yes (7)  | no       | 18 | -  | <5% (BM) and <2% (PB) | FA-BMF        | 6  | 46,XY[20]                                                                                                                                                                                                                                                                   | -                                     | -   |
| FA58 | M | 6  | FANCA     | yes (9)  | no       | 9  | -  | <5% (BM) and <2% (PB) | FA-BMF        | 9  | 46,XY[16].nuc ish 3q26(EV11x2),cen7(CEP7x2),7q31(D7S486x2),cen8(CEP8x2),21q22(AML1x2)[100]                                                                                                                                                                                  | -                                     | -   |
|      |   |    |           |          |          |    |    |                       |               | 9  | no metaphases.nuc ish cen7(CEP7x2),7q31(D7S486x2),cen8(CEP8x2)[100]                                                                                                                                                                                                         |                                       |     |
|      |   |    |           |          |          |    |    |                       |               | 11 | 46,XY[20].nuc ish 3q26(EV1x2),cen7(CEP7x2),7q31(D7S486x2),cen8(CEP8x2)[100]                                                                                                                                                                                                 |                                       |     |
|      |   |    |           |          |          |    |    |                       |               | 11 | 46,XY[20]                                                                                                                                                                                                                                                                   |                                       |     |
|      |   |    |           |          |          |    |    |                       |               | 12 | 46,XY[20].nuc ish 3q26(EV11x2)[100/100],cen7(CEP7x2),7q31(D7S486x2),cen8(CEP8x2)[100/100]                                                                                                                                                                                   | -7                                    | no  |
|      |   |    |           |          |          |    |    |                       |               | 13 | 46,XY[15].nuc ish 3q26(EV11x2)[99/100],cen7(CEP7x2),7q31(D7S486x2)[99/100],cen8(CEP8x2)[99/100]                                                                                                                                                                             |                                       |     |
|      |   |    |           |          |          |    |    |                       |               | 14 | 45,XY,-7[9]/46,XY[6].nuc ish 3q26(EV11x2)[98/100],cen7(CEP7x1),7q31(D7S486x1)[13/100],cen8(CEP8x2)[99/100],21q22 (AML1x2)[96/100]                                                                                                                                           |                                       |     |
| FA60 | F | 11 | not known | no       | no       | 13 | -  | <5% (BM) and <2% (PB) | FA-BMF        | 11 | 46,XX[15].nuc ish cen7(CEP7x2),7q31(D7S486x2),cen8(CEP8x2)[100]                                                                                                                                                                                                             | -                                     | -   |
|      |   |    |           |          |          |    |    |                       |               | 11 | 46,XX[15].nuc ish cen7(CEP7x2),7q31(D7S486x2),cen8(CEP8x2)[100]                                                                                                                                                                                                             |                                       |     |
|      |   |    |           |          |          |    |    |                       |               | 17 | 45,XY,-7 [20]/46,XY[1].nuc ish 3q26(EV11x2)[100/100],cen7(CEP7x1),7q31(D7S486x1)[93/100],8q22(ETOx2),21q22(AML1x2)[100/100],11q23(MLLx2)[100/100],16q22(CBFBx2)[100/100],17q21.1(RARAx2)[100/100]                                                                           |                                       |     |
| FA61 | M | 11 | not known | yes (17) | yes (18) | 18 | 17 | ≥20% (PB or BM)       | FA-AML        | 17 | 45,XY,-7[17]/44,idem,-18[3]                                                                                                                                                                                                                                                 | -7                                    | yes |
|      |   |    |           |          |          |    |    |                       |               | 17 | 45,XY,-7[19]/45,idem,?add(17)(q24)[2]/45,idem,?del(12)(p11p12)[4].nuc ish cen7(CEP7x1),7q31(D7S486x1)[100/100],12p13(TELx2)[100/100],21q22 (AML1x2)[100/100]                                                                                                                |                                       |     |
|      |   |    |           |          |          |    |    |                       |               | 17 | no metaphases.nuc ish cen7(CEP7x1),7q31(D7S486x1)[16/20]                                                                                                                                                                                                                    |                                       |     |
|      |   |    |           |          |          |    |    |                       |               | 18 | 45,XY,-7 [7]/46,XX [8].nuc ish cen7(CEP7x1),7q31(D7S486x1)[13/100]                                                                                                                                                                                                          |                                       |     |
| FA62 | M | 10 | FANCA     | yes (10) | no       | 17 | -  | <5% (BM) and <2% (PB) | FA-BMF        | 10 | 46,XY[6].nuc ish cen7(CEP7x2),7q31(D7S486x2),cen8(CEP8x2)[100]                                                                                                                                                                                                              | -                                     | -   |
| FA63 | M | 8  | not known | yes (11) | no       | 9  | -  | <5% (BM) and <2% (PB) | FA-BMF        | 8  | 46,XY[22].nuc ish cen7(CEP7x2),7q31(D7S486x2),cen8(CEP8x2)[100]                                                                                                                                                                                                             | -                                     | -   |
|      |   |    |           |          |          |    |    |                       |               | 8  | 46,XY[20].nuc ish 3q26(EV11x2)[100/100],21q22(AML1x2)[99/100]                                                                                                                                                                                                               |                                       |     |
| FA64 | F | 4  | FANCA     | yes (7)  | no       | 9  | -  | <5% (BM) and <2% (PB) | FA-BMF        | 4  | 46,XX [20].nuc ish cen7(CEP7x2),7q31(D7S486x2),cen8(CEP8x2)[100]                                                                                                                                                                                                            | -                                     | -   |
| FA65 | M | 5  | FANCC     | no       | no       | 6  | -  | <5% (BM) and <2% (PB) | FA-BMF        | 5  | 46,XY[20].nuc ish cen7(CEP7x2),7q31(D7S486x2),cen8(CEP8x2)[100],21q22(AML1x2)[100/100]                                                                                                                                                                                      | -                                     | -   |
|      |   |    |           |          |          |    |    |                       |               | 6  | 46,XY,inc[1].nuc ish 1p36(SRDx2),1q21(1q21x2)[100/100],3q26(EV11x2)[100/100],cen7(CEP7x2),7q31(D7S486x2)[100/100],cen8(CEP8x2)[96/100]                                                                                                                                      |                                       |     |
| FA66 | F | 10 | not known | yes (10) | no       | 10 | -  | <5% (BM) and <2% (PB) | FA-BMF        | 10 | 46,XX[1].nuc ish cen7(CEP7x2),7q31(D7S486x2),cen8(CEP8x2)[100]                                                                                                                                                                                                              | -                                     | -   |
|      |   |    |           |          |          |    |    |                       |               | 10 | 46,XX[1].nuc ish 3q26(EV11x2),cen7(CEP7x2),7q31(D7S486x2), cen8(CEP8x2)[100],21q22(AML1x2)[100/100]                                                                                                                                                                         |                                       |     |
|      |   |    |           |          |          |    |    |                       |               | 9  | 46,XX[20].nuc ish cen7(CEP7x2),7q31(D7S486x2),cen8(CEP8x2)[100]                                                                                                                                                                                                             |                                       |     |
|      |   |    |           |          |          |    |    |                       |               | 10 | 46,XX,inc[8].nuc ish 3q26(EV11x2),cen7(CEP7x2),7q31(D7S486x2),cen8(CEP8x2)[100]                                                                                                                                                                                             |                                       |     |
| FA67 | F | ?  | FANCA     | no       | no       | 12 | -  | <5% (BM) and <2% (PB) | FA-BMF        | 11 | no metaphases.nuc ish cen7(CEP7x2),7q31(D7S486x2)[99/100],cen8(CEP8x2)[97/100]                                                                                                                                                                                              | -                                     | -   |
|      |   |    |           |          |          |    |    |                       |               | 12 | 46,XX[15].nuc ish 3q26(EV11x2)[100/100],cen7(CEP7x2),7q31(D7S486x2)[98/100], cen8(CEP8x2)[98/100]                                                                                                                                                                           |                                       |     |
| FA69 | M | 8  | not known | no       | no       | 8  | -  | <5% (BM) and <2% (PB) | FA-BMF        | 8  | 46,XY[17].nuc ish cen7(CEP7x2),7q31(D7S486x2),cen8(CEP8x2)[100]                                                                                                                                                                                                             | -                                     | -   |
| FA70 | M | 8  | not known | no       | no       | 12 | ?  | <5% (BM) and <2% (PB) | FA-MDS-non EB | 8  | 47,XY,+der(1;5)(q10;p10),t(1;5)(q10;p10)[6]/48,idem,+8[9].nuc ish 1p36(SRDx2),1q21(1q21x3)[95/100],5p15.2(5p15.2x3),5q31(EGR1x2)[88/100],cen7(CEP7x2),7q31(D7S486x2)[100/100], cen8(CEP8x3)[35/100],21q22(5' AML1x1,3' AML1x2)(5' AML1 con 3' AML1x1)[75/100]               | 1q+;3q+;+8; RUNX1 (AML1 ) abnormality | yes |
|      |   |    |           |          |          |    |    |                       |               | 12 | 48,XY,+der(1;5)(q10;p10),t(1;5)(q10;p10),+8[2]/48,idem.add(2)(p16)[10]/48,idem.del(11)(q14)[6]/49,idem.del(11)(q14),+19[2].nuc ish 1p32(CKS1Bx2),1q21(CDKN2Cx3)[52/100],3q26(EV11x3)[53/100],cen8(CEP8x3)[85/100],21q22(5' AML1x1,3' AML1x2)(5' AML1 con 3' AML1x1)[69/100] |                                       |     |

|      |   |     |           |          |    |    |    |                       |               |                                                    |                                                                                                                                                                                                                                                                                                                                                                                                                                                                                                                                                                                                                                                                                                                                                                                                                                                                                                                                                                                                                                                                                                                             |                          |                  |
|------|---|-----|-----------|----------|----|----|----|-----------------------|---------------|----------------------------------------------------|-----------------------------------------------------------------------------------------------------------------------------------------------------------------------------------------------------------------------------------------------------------------------------------------------------------------------------------------------------------------------------------------------------------------------------------------------------------------------------------------------------------------------------------------------------------------------------------------------------------------------------------------------------------------------------------------------------------------------------------------------------------------------------------------------------------------------------------------------------------------------------------------------------------------------------------------------------------------------------------------------------------------------------------------------------------------------------------------------------------------------------|--------------------------|------------------|
| FA72 | M | 4   | not known | yes (6)  | no | 6  | -  | <5% (BM) and <2% (PB) | FA-BMF        | 4<br>6<br>6                                        | 46,XY[18].nuc ish cen7(CEP7x2),7q31(D7S486x2),cen8(CEP8x2)[100]<br>46,XY[15].nuc ish 3q26(EV11x2)[100/100],cen7(CEP7x2),7q31(D7S486x)[99/100],<br>cen8(CEP8x2)[100/100],21q22(AML1x2)[100/100]<br>//46,XX[20].nuc ish 3q26(EV11x2)[99/100], cen7(CEP7x2),7q31(D7S486x2)[100/100],cen8(CEP8x2)[99/100]                                                                                                                                                                                                                                                                                                                                                                                                                                                                                                                                                                                                                                                                                                                                                                                                                       | -                        | -                |
| FA74 | F | 1   | FANCD2    | no       | no | 6  | -  | <5% (BM) and <2% (PB) | FA-BMF        | 6                                                  | 46,XX[20].nuc ish 21q22(AML1x2)[99/100]                                                                                                                                                                                                                                                                                                                                                                                                                                                                                                                                                                                                                                                                                                                                                                                                                                                                                                                                                                                                                                                                                     | -                        | -                |
| FA75 | M | 3   | FANCA     | no       | no | 7  | -  | <5% (BM) and <2% (PB) | FA-BMF        | 4<br>4<br>5<br>6<br>7                              | 46,XY[15].nuc ish 3q26(EV11x2),cen7(CEP7x2),7q31(D7S486x2),cen8(CEP8x2)[100]<br>46,XY[15].nuc ish 3q26(EV11x2)[100/100], cen7(CEP7x2),7q31(D7S486x2)[100/100],cen8(CEP8x2)[100/100]<br>46,XY,inc[1].nuc ish 1p36(SRDx2),1q21(1q21x2)[99/100],cen7(CEP7x2),7q31(D7S486x2)[99/100],<br>cen8(CEP8x2)[99/100]<br>46,XY[20].nuc ish 3q26(EV11x2)[100/100], cen7(CEP7x2),7q31(D7S486x2)[100/100],cen8(CEP8x2)[99/100]<br>46,XY[15].nuc ish 3q26(EV11x2)[99/100],cen7(CEP7x2),7q31(D7S486x2)[100/100],<br>cen8(CEP8x2)[96/100],21q22(AML1x2)[98/100]                                                                                                                                                                                                                                                                                                                                                                                                                                                                                                                                                                               | -                        | -                |
| FA76 | M | 1   | FANCB     | yes (4)  | no | 5  | ?  | ≥20% (PB or BM)       | FA-AML        | 4<br>4<br>4<br>5<br>5<br>5<br>5                    | 46,XX,?ins(7;7)(q31;q31q35)[5]/46,XY[10].<br>nuc ish 3q26(EV11x2)[100/100],cen7(CEP7x2),7q31(D7S486x2)[94/100],cen8(CEP8x2)[97/100]<br>46,XX,ins(7;7)(q31;q31q35)[5]/46,XY[10].ish ins(7;7)(q31;q31q35) (CEP7+,D7S486+;CEP7+,D7S486+)[5/7].nuc ish<br>3q26(EV11x2)[100/100], cen7(CEP7x2),7q31(D7S486x2)[94/100],cen8(CEP8x2)[97/100]<br>//46,XX[17]/46,XY,ins(7;7)(q31;q31q35)[1]/46,XY[3]<br>//46,XX[17]/46,XY,ins(7;7)(q31;q31q35)[1]/46,XY[3].nuc ish 3q26(EV11x2)[100/100],cen7(CEP7x2),<br>7q31(D7S486x2)[100/100],cen8(CEP8x2)[96/100],21q22(AML1x2)(5' AML1 sep 3' AML1x1)[46/100]<br>//46,XX[1]/46,XY,ins(7;7)(q31;q31q35)[6]/46,XY[8]<br>46,XY,ins(7;7)(q31;q31q35),inc[2]/46,XY,inc[17]/46,XX,inc[1].<br>nuc ish 3q26(EV11x2)[100/100],11q23(MLLx2)[96/100],16q22(CBFBx2)[99/100],17q21.1(RARAx2)[98/100]<br>//46,XX[15]<br>//46,XX[15]                                                                                                                                                                                                                                                                          | cryptic<br>R/UNXI (AML1) | no<br>aberration |
| FA77 | M | 0.3 | FANCC     | no       | no | 18 | -  | <5% (BM) and <2% (PB) | FA-AIP        | 13<br>14<br>14<br>15<br>16<br>16<br>17<br>18       | 46,XY,del(7)(p12p21)[12]/46,XY[8].nuc ish 3q26(EV11x2),cen7(CEP7x2),7q31(D7S486x2),cen8(CEP8x2)[100]<br>46,XY,del(7)(p12p21)[3]/46,XY [4].nuc ish cen7(CEP7x2),7q31(D7S486x2),cen8(CEP8x2),3q26(EV11x2)[100]<br>46,XY,inc[2].nuc ish cen7(CEP7x2),7q31(D7S486x2),cen8(CEP8x2)[100]<br>46,XY,del(7)(p12p21)[12]/46,XY[8].nuc ish 3q26(EV11x2),cen7(CEP7x2),7q31(D7S486x2),cen8(CEP8x2)[100]<br>46,XY,del(7)(p12p21)[8]/46,XY[7].nuc ish 3q26(EV11x2)[100/100],cen7(CEP7x2),<br>7q31(D7S486x2)[98/100],cen8(CEP8x2)[96/100]<br>46,XY,del(7)(p12p21)[5]/46,XY[2].nuc ish 3q26(EV11x2)[100/100],cen7(CEP7x2),<br>7q31(D7S486x2)[99/100],cen8(CEP8x2)[100/100]<br>46,XY,del(7)(p12p21)[11]/46,XY[4].nuc ish 3q26(EV11x2)[100/100],cen7(CEP7x2),<br>7q31(D7S486x2)[99/100],cen8(CEP8x2)[98/100]<br>46,XY,del(7)(p12p21)[10]/46,XY[5].nuc ish 3q26(EV11x2)[1010/100],cen7(CEP7x2),<br>7q31(D7S486x2)[96/100],cen8(CEP8x2)[97/100],21q22(AML1x2)[98/100]                                                                                                                                                                            | 7p-                      | no               |
| FA79 | F | 10  | FANCA     | yes (11) | no | 12 | 10 | <5% (BM) and <2% (PB) | FA-MDS-non EB | 10<br>11<br>11<br>11<br>12<br>12<br>12<br>12<br>12 | 47,X,add(X)(p22),+der(1)add(1)(p12)dup(1)(q12q43),der(3)t(3;?3)(p26;?q24)x2,der(11)t(3;11)(q24;p15),<br>der(15)t(3;15)(q24;q26)[cp15].nuc ish 1p36(SRDx2),1q21(1q21x3-4)[75/100],1p36(SRDx4),<br>1q21(1q21x4)[14/100],3q26(EV11x3-6)[95/100],cen7(CEP7x2),7q31(D7S486x2)[99/100],<br>cen8(CEP8x2)[100/100],21q22(AML1x2)[99/100]<br>47,X,add(X)(p22),+der(1)add(1)(p12)dup(1)(q12q43),der(3)t(3;?3)(p26;?q24)x2,<br>der(11)t(3;11)(q24;p15),der(15)t(3;15)(q24;q26)[cp15].nuc ish 1p36(SRDx2),1q21(1q21x3-4)[96/100],<br>3q26(EV11x3-5)[89/100]<br>46,XX,inc[7].nuc ish 3q26(EV11x2)[100/100],cen7(CEP7x2),7q31(D7S486x2)[97/100],cen8(CEP8x2)[99/100]<br>46,XX[15].nuc ish 1p36(SRDx2),1q21(1q21x2)[100/100],3q26(EV11x2)[100/100]<br>46,XX,del(20)(q12q13)[7]/46,XX[8].nuc ish 3q26(EV11x2)[100/100],20q12(D20S108x1)[28/100]<br>46,XX,del(20)(q12q13)[1]/46,XX[18].nuc ish 7q34(TCRBx2)[99/100],20q12(D20S108x1)[14/100]<br>46:XX,del(20)(q12q13)[10]/46,XX[5].nuc ish 20q12(D20S108x1)[58/100],7q34(TCRBx2)[100/100]<br>46,XX,inc[7].nuc ish 20q12(D20S108x1)[53/100]<br>no metaphases.nuc ish 20q12(D20S108x1)[74/100] | 1q+; 3q+                 | no               |



|      |   |    |           |          |    |    |    |                       |               |    |                                                                                                                                                                                                     |          |    |
|------|---|----|-----------|----------|----|----|----|-----------------------|---------------|----|-----------------------------------------------------------------------------------------------------------------------------------------------------------------------------------------------------|----------|----|
| FA80 | M | 5  | FANCA     | no       | no | 7  | -  | <5% (BM) and <2% (PB) | FA-BMF        | 7  | 46.XY[15].nuc ish 3q26(EV11x2)[100/100],cen7(CEP7x2),7q31(D7S486x2)[99/100],cen8(CEP8x2)[100/100],21q22(AML1x2)[96/100]                                                                             | -        | -  |
| FA82 | M | ?  | FANCA     | no       | no | 2  | -  | <5% (BM) and <2% (PB) | FA-BMF        | 1  | 46.XX[16].nuc ish 3q26(EV11x2)[100/100],cen7(CEP7x2),7q31(D7S486x2)[97/100], cen8(CEP8x2)[95/100]                                                                                                   | -        | -  |
|      |   |    |           |          |    |    |    |                       |               | 2  | 46.XY[10].nuc ish 3q26(EV11x2)[99/100],cen7(CEP7x2),7q31(D7S486x2)[96/100], cen8(CEP8x2)[98/100],21q22(AML1x2)[99/100]                                                                              |          |    |
| FA83 | F | 2  | FANCC     | yes (4)  | no | 4  | -  | <5% (BM) and <2% (PB) | FA-BMF        | 4  | 46.XX,inc[10].nuc ish 3q26(EV11x2)[100/100],cen7(CEP7x2),7q31(D7S486x2)[100/100], cen8(CEP8x2)[97/100]                                                                                              | -        | -  |
|      |   |    |           |          |    |    |    |                       |               | 4  | 46.XX,inc[2]                                                                                                                                                                                        |          |    |
|      |   |    |           |          |    |    |    |                       |               | 6  | 46.XY[15]                                                                                                                                                                                           |          |    |
| FA84 | M | 5  | FANCP     | no       | no | 18 | -  | <5% (BM) and <2% (PB) | FA-AIP        | 16 | 46.XY,+1,dic(1;18)(p11;q22)[3]/46.XY[13].nuc ish 1p36(SRDx2),1q21(1q21x3)[10/100],3q26(EV11x2)[100/100],cen7(CEP7x2),7q31(D7S486x2)[99/100],cen8(CEP8x2)[100/100]                                   | 1q+      | no |
|      |   |    |           |          |    |    |    |                       |               | 17 | 46.XY,+1,dic(1;18)(p11;q22)[3]/46.XY[8].nuc ish 1p36(SRDx2),1q21(1q21x3)[16/100]                                                                                                                    |          |    |
|      |   |    |           |          |    |    |    |                       |               | 18 | 46.XY[15].nuc ish 1p36(SRDx2),1q21(1q21x3)[3/100],3q26(EV11x2)[99/100],cen7(CEP7x2),7q31(D7S486x2)[97/100],cen8(CEP8x2)[96/100],21q22(AML1x2)[99/100]                                               |          |    |
|      |   |    |           |          |    |    |    |                       |               | 20 | 46.XX[2].nuc ish 3q26(EV11x2),8q22(ETOx2),21q22(AML1x2),11q23(MLLx2),16q22(CBFBx2),17q21.1(RARAx2)[100]                                                                                             |          |    |
| FA85 | F | ?  | FANCA     | no       | no | 23 | -  | <5% (BM) and <2% (PB) | FA-BMF        | 21 | 46.XX[15].nuc ish 3q26(EV11x2),cen7(CEP7x2),7q31(D7S486x2),cen8(CEP8x2)[100]                                                                                                                        | -        | -  |
|      |   |    |           |          |    |    |    |                       |               | 22 | 46.XX[21].nuc ish 3q26(EV11x2),cen7(CEP7x2),7q31(D7S486x2),cen8(CEP8x2)[100]                                                                                                                        |          |    |
|      |   |    |           |          |    |    |    |                       |               | 23 | 46.XY[20].nuc ish 3q26(EV11x2),cen7(CEP7x2),7q31(D7S486x2), cen8(CEP8x2)[100],21q22(AML1x2)[98/100]                                                                                                 |          |    |
| FA86 | F | ?  | FANCC     | no       | no | 33 | -  | <5% (BM) and <2% (PB) | FA-AIP        | 32 | 46.XX,der(1)t(1;1)(p36;q24)[8]/47.XX,+9[4]/46.XX[3].nuc ish 1p36(SRDx2),1q21(1q21x3)[53/100],3q26(EV11x2)[100/100],cen7(CEP7x2),7q31(D7S486x2)[99/100],cen8(CEP8x2)[100/100],21q22(AML1x2)[100/100] | 1q+      | no |
|      |   |    |           |          |    |    |    |                       |               | 11 | 46.XY[15].nuc ish 1p36(SRDx2),1q21(1q21x3)[2/100],3q26(EV11x2)[96/100],cen7(CEP7x2),7q31(D7S486x2)[100/100],cen8(CEP8x2)[100/100]                                                                   |          |    |
|      |   |    |           |          |    |    |    |                       |               | 12 | 46.XY[15].nuc ish 3q26(EV11x2)[96/100],cen7(CEP7x2),7q31(D7S486x2)[100/100],cen8(CEP8x2)[100/100]                                                                                                   |          |    |
|      |   |    |           |          |    |    |    |                       |               | 12 | 46.XY[15].nuc ish 1p36(SRDx2),1q21(1q21x3)[2/100],3q26(EV11x2)[96/100],cen7(CEP7x2),7q31(D7S486x2)[100/100],cen8(CEP8x2)[100/100]                                                                   |          |    |
|      |   |    |           |          |    |    |    |                       |               | 13 | 46.XY.dup(1)(q21q43).inc[2]/46.XY,inc[7].nuc ish 3q26(EV11x2)[98/100],cen7(CEP7x2),7q31(D7S486x2)[99/100],cen8(CEP8x2)[99/100]                                                                      |          |    |
|      |   |    |           |          |    |    |    |                       |               | 13 | 46.XY,del(13)(q14q31)[2]/46.XY[13].nuc ish 1p36(SRDx2),1q21(1q21x2)[97/100],13q14(D13S319x2),13q34(13q34x2)[94/100]                                                                                 |          |    |
|      |   |    |           |          |    |    |    |                       |               | 14 | 46.XY,del(13)(q14q31)[2]/46.XY[18].nuc ish 3q26(EV11x2)[100/100],cen7(CEP7x2),7q31(D7S486x2)[99/100]                                                                                                |          |    |
|      |   |    |           |          |    |    |    |                       |               | 14 | 46.XY,der(7)t(1;7)(?;p11)[3]/46.XY[12].nuc ish 3q26(EV11x2)[100/100],cen7(CEP7x2),7q31(D7S486x2)[100/100],cen8(CEP8x2)[99/100]                                                                      |          |    |
|      |   |    |           |          |    |    |    |                       |               | 14 | 46.XY,del(13)(q14q31)[2]/46.XY[14].nuc ish 3q26(EV11x2)[100/100],cen7(CEP7x2),7q31(D7S486x2)[98/100],21q22(AML1x2)[98/100]                                                                          |          |    |
|      |   |    |           |          |    |    |    |                       |               | 14 | 46.XY,del(13)(q14q31)[2]/46.XY,dup(1)(q21q43)[2]/46.XY[11].nuc ish 1p36(SRDx2),1q21(1q21x2)[100/100],3q26(EV11x2)[99/100],cen7(CEP7x2),7q31(D7S486x2)[99/100],cen8(CEP8x2)[96/100]                  |          |    |
|      |   |    |           |          |    |    |    |                       |               | 9  | 46.XY[9].nuc ish cen7(CEP7x2),7q31(D7S486x2),cen8(CEP8x2)[100]                                                                                                                                      |          |    |
| FA87 | M | 12 | not known | no       | no | 14 | -  | <5% (BM) and <2% (PB) | FA-AIP        | 13 | 46.XY,del(13)(q14q31)[2]/46.XY[13].nuc ish 1p36(SRDx2),1q21(1q21x2)[97/100],13q14(D13S319x2),13q34(13q34x2)[94/100]                                                                                 | 1q+; 7p- | no |
| FA89 | M | ?  | FANCA     | ?        | no | 20 | 20 | <5% (BM) and <2% (PB) | FA-MDS-non EB | 20 | 46.XY,der(7)t(3;7)(q22;q31)[15].nuc ish 3q26(EV11x3)[93/100],cen7(CEP7x2),7q31(D7S486x1)[96/100],cen8(CEP8x2)[100/100],21q22(AML1x2)[100/100]                                                       | 3q+; 7q- | no |
|      |   |    |           |          |    |    |    |                       |               | 20 | 46.XY[15].nuc ish 3q26(EV11x2)[99/100],cen7(CEP7x2),7q31(D7S486x2)[99/100]                                                                                                                          |          |    |
| FA90 | F | 12 | not known | no       | no | 13 | -  | <5% (BM) and <2% (PB) | FA-BMF        | 12 | 46.XX[15].nuc ish cen7(CEP7x2),7q31(D7S486x2),cen8(CEP8x2)[100],21q22(AML1x2)[100/100]                                                                                                              | -        | -  |
|      |   |    |           |          |    |    |    |                       |               | 13 | no metaphases.nuc ish cen7(CEP7x2),7q31(D7S486x2)[99/100],cen8(CEP8x2)[96/100]                                                                                                                      |          |    |
| FA91 | M | 7  | FANCA     | yes (16) | no | 16 | -  | <5% (BM) and <2% (PB) | FA-BMF        | 7  | 46.XY[7].nuc ish cen7(CEP7x2),7q31(D7S486x2),cen8(CEP8x2)[100]                                                                                                                                      | -        | -  |
|      |   |    |           |          |    |    |    |                       |               | 8  | 46.XY[15].nuc ish 3q26(EV11x2),cen7(CEP7x2),7q31(D7S486x2),cen8(CEP8x2)[100]                                                                                                                        |          |    |
|      |   |    |           |          |    |    |    |                       |               | 16 | 46.XY,inc[15].nuc ish 3q26(EV11x2)[100/100],cen7(CEP7x2),7q31(D7S486x2)[95/100], cen8(CEP8x2)[92/100]                                                                                               |          |    |
| FA92 | M | 25 | not known | no       | no | 25 | -  | <5% (BM) and <2% (PB) | FA-BMF        | 16 | 46.XX[20].nuc ish 3q26(EV1x2)[100/100],cen7(CEP7x2),7q31(D7S486x2)[100/100], cen8(CEP8x2)[100/100]                                                                                                  | -        | -  |
|      |   |    |           |          |    |    |    |                       |               | 25 | 46.XY[16].nuc ish 3q26(EV11x2)[100/100],cen7(CEP7x2),7q31(D7S486x2)[96/100],cen8(CEP8x2)[100/100],21q22(AML1x2)[95/100]                                                                             |          |    |
| FA94 | F | ?  | not known | no       | no | 32 | -  | <5% (BM) and <2% (PB) | FA-BMF        | 32 | 46.XX[15].nuc ish 3q26(EV11x2)[100/100],cen7(CEP7x2),7q31(D7S486x2)[95/100], cen8(CEP8x2)[97/100]                                                                                                   | -        | -  |

|       |   |    |           |          |    |    |   |                       |                            |                               |                                                                                                                                                                                                                                                                                                                               |         |    |
|-------|---|----|-----------|----------|----|----|---|-----------------------|----------------------------|-------------------------------|-------------------------------------------------------------------------------------------------------------------------------------------------------------------------------------------------------------------------------------------------------------------------------------------------------------------------------|---------|----|
| FA95  | M | ?  | FANCA     | yes (11) | no | 12 | - | <5% (BM) and <2% (PB) | FA-BMF                     | 9<br>9<br>10<br>10<br>11<br>8 | 46,XY,inc[10]<br>46,XY[20],.nuc ish cen7(CEP7x2),7q31(D7S486x2),cen8(CEP8x2)[100]<br>46,XY[15]<br>46,XY[20]<br>46,XY[15].nuc ish 21q22(AML1x2)[100/100]<br>no metaphases.nuc ish cen7(CEP7x2),7q31(D7S486x2)[97/100]                                                                                                          | -       | -  |
| FA97  | M | 9  | not known | yes (9)  | no | 9  | - | <5% (BM) and <2% (PB) | FA-BMF                     | 9<br>9                        | 46,XY[15].nuc ish cen7(CEP7x2),7q31(D7S486x2)[98/100], cen8(CEP8x2)[95/100],21q22(AML1x2)[99/100]<br>46,XY[15].nuc ish 3q26(EV11x2)[100/100],cen7(CEP7x2),7q31(D7S486x2)[98/100], cen8(CEP8x2)[95/100],21q22(AML1x2)[99/100]                                                                                                  | -       | -  |
| FA99  | F | 11 | FANCA     | ?        | ?  | 12 | - | <5% (BM) and <2% (PB) | FA-BMF                     | 12                            | 46,XX[20].nuc ish 3q26(EV11x2),cen7(CEP7x2),7q31(D7S486x2),cen8(CEP8x2),21q22(AML1x2)[100]                                                                                                                                                                                                                                    | -       | -  |
| FA100 | M | 13 | FANCA     | ?        | ?  | 13 | - | <5% (BM) and <2% (PB) | FA-BMF                     | 13                            | 46,XY,inc[12].nuc ish cen7(CEP7x2),7q31(D7S486x2),cen8(CEP8x2)[100],21q22(AML1x2)[96/100]                                                                                                                                                                                                                                     | -       | -  |
| FA102 | M | ?  | not known | yes (17) | no | 17 | - | <5% (BM) and <2% (PB) | FA-BMF                     | 16<br>16                      | 46,XY,inc[17].nuc ish 9q34(ABL1x2),22q11(BCRx2)[98/100],11q23(MLLx2)[100/100],12p13(ETV6x2), 21q22(RUNX1x2)[98/100],19p13(E2Ax2)[95/100],21q22(AML1x2)[100/100]<br>46,XY[15].nuc ish cen7(CEP7x2),7q31(D7S486x2)[99/100],cen8(CEP8x2)[98/100]                                                                                 | -       | -  |
| FA108 | F | ?  | FANCA     | ?        | no | 16 | - | <5% (BM) and <2% (PB) | FA-BMF                     | 15                            | 46,XX[1].nuc ish cen7(CEP7x2),7q31(D7S486x2)[97/100],cen8(CEP8x2)[99/100]                                                                                                                                                                                                                                                     | -       | -  |
| FA130 | F | ?  | not known | no       | no | 13 | - | <5% (BM) and <2% (PB) | no categorization possible | 12<br>12<br>13<br>13          | 46,XX[15].nuc ish cen7(CEP7x2),7q31(D7S486x2)[100/100],cen8(CEP8x2)[100/100]<br>46,XX[15].nuc ish 3q26(EV11x2)[100/100]<br>46,XX,der(7)t(?3;7)(q26;q21)[2]/46,XX[13].nuc ish 3q26(EV11x3)[4/100],cen7(CEP7x2), 7q31(D7S486x2)[100/100],cen8(CEP8x2)[100/100]<br>46,XX[20].nuc ish 3q26(EV11x2)[99/100],21q22(AML1x2)[100/100] | 3q+,7q- | no |

\*1 pathogenic variant in *RUNX1* (Chao MM et al. Mutational Spectrum of Fanconi... Klin Padiatr 2017; 229:329-334)

\*2 pathogenic variant in *RUNX1* (Chao MM et al. Mutational Spectrum of Fanconi... Klin Padiatr 2017; 229:329-334)

\*3 pathogenic variant in *SF3B1* (Chao MM et al. Mutational Spectrum of Fanconi... Klin Padiatr 2017; 229:329-334); MDS with ring sideroblasts: patient not included in this study

\*4 pathogenic variant in *RUNX1*

**Table S2. Chromosomal aberrations in the 86 FA patients**

| chromosomal aberration                             | all patients with FA<br>(n= 86) | myeloid neoplasia<br>(n= 15) | FA-AIP<br>(n= 10) | P-value* |
|----------------------------------------------------|---------------------------------|------------------------------|-------------------|----------|
| <b>karyotype</b>                                   |                                 |                              |                   |          |
| Normal                                             | 60/86 (70%)                     | 0/15                         | 0/10              |          |
| Abnormal                                           | 26/86 (30%)                     | 15/15 (100%)                 | 10/10 (100%)      | <0.05    |
| └ Complex                                          | 5/86 (6%)                       | 5/15 (33%)                   | 0/10              | <0.05    |
| <b>recurrent aberration</b>                        |                                 |                              |                   |          |
| 1q+ isolated                                       | 5/86 (6%)                       | 0/15                         | 5/10 (50%)        | ns       |
| 1q+ and 3q+                                        | 3/86 (3%)                       | 3/15 (20%)                   | 0/10              | <0.05    |
| 1q+ and 6p-                                        | 1/86 (1%)                       | 0/15                         | 1/10 (10%)        | ns       |
| 1q+ and 7q-                                        | 2/86 (2%)                       | 2/15 (13%)                   | 0/10              | <0.05    |
| 1q+, 3q+, +8 and<br><i>RUNX1 (AML1)</i> aberration | 1/86 (1%)                       | 1/15 (7%)                    | 0/10              | ns       |
| 3q+ and 7q-                                        | 4/86 (5%)                       | 4/15 (27%)                   | 0/10              | <0.05    |
| 6p- isolated                                       | 1/86 (1%)                       | 0/15                         | 1/10 (10%)        | ns       |
| 7p- isolated                                       | 3/86 (3%)                       | 0/15                         | 3/10 (30%)        | ns       |
| 7q- isolated                                       | 1/86 (1%)                       | 1/15 (7%)                    | 0/10              | ns       |
| 7q- and 6p-                                        | 1/86 (1%)                       | 1/15 (7%)                    | 0/10              | ns       |
| -7 isolated                                        | 3/86 (3%)                       | 3/15 (20%)                   | 0/10              | <0.05    |
| 11q- and +21                                       | 1/86 (1%)                       | 0/15                         | 1/10 (10%)        | ns       |
| <i>RUNX1 (AML1)</i> aberration                     | 1/86 (1%)                       | 1/15 (7%)                    | 0/10              | ns       |
| <b>clonal evolution</b>                            | 9/86 (10%)                      | 8/15 (53%)                   | 1/10 (10%)        | <0.05    |

\* Fisher's exact test

Karyotype (ISCN) at time point of last cytogenetic examination (FA-BMF), at time point of transformation (FA-MDS-non EB, FA-MDS-EB, FA-AML) or at time point/s of last cytogenetic examination with recurrent aberrations (FA-AIP)

**Table S3. Overview of laboratory results of FA patients (n=86).** Karyotype (ISCN) relevant for classification is highlighted in bold.

| FA-ID | Sex | Blasts in BM and PB                   |                                                    |                         |        |        | Age at karyotype analysis (years)                                                                                     | Karyotype (ISCN)*   | recurrent aberrations |
|-------|-----|---------------------------------------|----------------------------------------------------|-------------------------|--------|--------|-----------------------------------------------------------------------------------------------------------------------|---------------------|-----------------------|
|       |     | <5% blasts in BM and <2% blasts in PB | ≥5 to <20% blasts in BM or ≥2 to <20% blasts in PB | ≥20% blasts in PB or BM | FA-BMF | FA-AIP |                                                                                                                       |                     |                       |
| FA1   | M   | X                                     |                                                    |                         |        | 9      | 46,XY[15]                                                                                                             |                     |                       |
| FA2   | M   |                                       |                                                    | X                       |        | 11     | <b>47-49,XY,+add(1)(p34),dup(3)(q13q26),+9,del(11)(q?23),del(13)(q13q21),+19,+21[cp6]//46,XX[1]</b>                   | 1q+; 3q+            |                       |
| FA3   | M   |                                       |                                                    |                         | X      | 2      | <b>46,XY,del(7)(q21q31)[2]/46,XY,add(20)(q13)[2]/46,XY[17]</b>                                                        | 7q-                 |                       |
| FA4   | M   | X                                     |                                                    |                         |        | 16     | 46,XY,inc[15]                                                                                                         |                     |                       |
| FA5   | F   | X                                     |                                                    |                         |        | 20     | 46,XX[15]                                                                                                             |                     |                       |
| FA6   | F   |                                       |                                                    | X                       |        | 24     | <b>46,XX,dup(1)(q23q41)[5]/46,idem,der(22)t(3;22)(q26;p12)[5]/46,XX[5].nuc ish 3q26(EVI1x3)[16/100]</b>               | 1q+, 3q+            |                       |
| FA7   | F   | X                                     |                                                    |                         |        | 6      | 46,XX[10]                                                                                                             |                     |                       |
| FA8   | F   | X                                     |                                                    |                         |        | 7      | 46,XX[3]                                                                                                              |                     |                       |
| FA9   | F   | X                                     |                                                    |                         |        | 9      | 46,XX[15]                                                                                                             |                     |                       |
| FA10  | M   | X                                     |                                                    |                         |        | 7      | 46,XY[25]                                                                                                             |                     |                       |
| FA11  | M   | X                                     |                                                    |                         |        | 8      | 46,XY[15]                                                                                                             |                     |                       |
| FA12  | M   |                                       |                                                    | X                       |        | 23     | <b>46,XY,der(7)t(7)(q10)del(7)(q21q35),der(13)t(1;13)(q12;p11)[6]/46,XY[9]</b>                                        | 1q+; 7q-            |                       |
| FA13  | M   |                                       |                                                    | X                       |        | 9      | <b>45,XY,-7[16].nuc ish cen7(CEP7x1)[70/100]</b>                                                                      | -7                  |                       |
| FA14  | F   | X                                     |                                                    |                         |        | 17     | 46,XX,inc[4]                                                                                                          |                     |                       |
| FA15  | F   | X                                     |                                                    |                         |        | 11     | 46,XX[15]                                                                                                             |                     |                       |
| FA19  | M   | X                                     |                                                    |                         |        | 20     | 46,XY,inc[2]                                                                                                          |                     |                       |
| FA20  | M   | X                                     |                                                    |                         |        | 6      | 46,XY[15]                                                                                                             |                     |                       |
| FA21  | M   | X                                     |                                                    |                         |        | 3      | 46,XY[15]                                                                                                             |                     |                       |
| FA22  | M   |                                       | X                                                  |                         |        | 15     | <b>46,XY,der(22)t(1;22)(q12;p13)[10]/46,XY[5].nuc ish 1p36(SRDx2),1q21(1q21x3)[79/100]</b>                            | 1q+                 |                       |
| FA23  | M   | X                                     |                                                    |                         |        | 7      | 46,XY[20]                                                                                                             |                     |                       |
| FA25  | F   |                                       | X                                                  |                         |        | 8      | <b>46,XX,?del(6)(p23),inc[3]/46,XX,inc[12]</b>                                                                        | 6p-                 |                       |
| FA26  | F   |                                       | X                                                  |                         |        | 18     | <b>46,XX,+1,der(1;15)(q10;q10)[5]/47,XX,+del(1)(p22p36)[4]/46,XX[6].<br/>1p36(SRDx2),1q21(1q21x3)[60/100]</b>         | nuc ish<br>1q+      |                       |
| FA27  | F   |                                       |                                                    |                         | X      | 11     | <b>46,XX,der(7)t(1;7)(q21;q31),der(16)t(9;16)(p12;p12)[20]</b>                                                        | 1q+; 7q-            |                       |
| FA28  | M   | X                                     |                                                    |                         |        | 9      | 46,XY[10]                                                                                                             |                     |                       |
| FA29  | M   | X                                     |                                                    |                         |        | 16     | 46,XY[20]                                                                                                             |                     |                       |
| FA30  | F   | X                                     |                                                    |                         |        | 4      | 46,XX[12]                                                                                                             |                     |                       |
| FA31  | F   | X                                     |                                                    |                         |        | 9      | 46,XX[15]                                                                                                             |                     |                       |
| FA32  | M   | X                                     |                                                    |                         |        | 10     | 46,XY[15]                                                                                                             |                     |                       |
| FA34  | F   | X                                     |                                                    |                         |        | 16     | 46,XX[15]                                                                                                             |                     |                       |
| FA35  | M   |                                       | X                                                  |                         |        | 14     | <b>46,XY,del(7)(p12)[4]/46,XY[16]</b>                                                                                 | 7p-                 |                       |
| FA36  | F   | X                                     |                                                    |                         |        | 14     | 46,XX[15]                                                                                                             |                     |                       |
| FA39  | M   |                                       |                                                    |                         | X      | 12     | <b>46,XY,del(7)(q21q33),der(19)t(3;19)(q24;p13)[15].<br/>3q26(EVI1x3)[56/100],cen7(CEP7x2),7q31(D7S486x1)[80/100]</b> | nuc ish<br>3q+; 7q- |                       |
| FA40  | F   | X                                     |                                                    |                         |        | 8      | 46,XX[20]                                                                                                             |                     |                       |
| FA41  | F   | X                                     |                                                    |                         |        | 5      | 46,XX[15]                                                                                                             |                     |                       |
| FA42  | M   | X                                     |                                                    |                         |        | 18     | 46,XY,inc[15]                                                                                                         |                     |                       |

|      |   |          |          |    |                                                                                                                                                                                                                                                                                         |         |                                              |
|------|---|----------|----------|----|-----------------------------------------------------------------------------------------------------------------------------------------------------------------------------------------------------------------------------------------------------------------------------------------|---------|----------------------------------------------|
| FA43 | F |          | <b>X</b> | 42 | 46,XX,del(6)(p22),der(7)t(?;7)(p22;p21)t(1;7)(p21;q31),t(15;18)(q24;q22)[13]/47,idem,+13[2]                                                                                                                                                                                             |         | 6p-; 7q-                                     |
| FA44 | M | <b>X</b> |          | 14 | 46,XY[15]                                                                                                                                                                                                                                                                               |         |                                              |
| FA45 | F |          | <b>X</b> | 16 | 46,XX,del(11)(q14q23)[3]/47,idem,+21[3]/46,XX[14].nuc ish 11q23(MLLx1)[73/100]                                                                                                                                                                                                          |         | 11q-; +21                                    |
| FA47 | F |          | <b>X</b> | 13 | 46,XX,der(6)t(1;6)(q21;p22)[10]/46,XX[10].nuc ish 1p36(SRDx2),1q21(1q21x3)[29/100]                                                                                                                                                                                                      |         | 1q+; 6p-                                     |
| FA48 | F | <b>X</b> |          | 6  | no metaphases.nuc ish cen7(CEP7x2),7q31(D7S486x2)[99/100],cen8(CEP8x2)[97/100]                                                                                                                                                                                                          |         |                                              |
| FA49 | F | <b>X</b> |          | 6  | 46,XX[15]                                                                                                                                                                                                                                                                               |         |                                              |
| FA50 | M | <b>X</b> |          | 21 | 46,XY[15]                                                                                                                                                                                                                                                                               |         |                                              |
| FA51 | F | <b>X</b> |          | 11 | 46,XX,inc[4]                                                                                                                                                                                                                                                                            |         |                                              |
| FA52 | M | <b>X</b> |          | 10 | 46,XY[8]                                                                                                                                                                                                                                                                                |         |                                              |
| FA53 | M | <b>X</b> |          | 15 | 46,XY[20]                                                                                                                                                                                                                                                                               |         |                                              |
| FA54 | F |          | <b>X</b> | 4  | 46,XX,der(7)t(3;7)(q13;q11),add(18)(p11)[15].<br>3q26(EVI1x3)[46/100],cen7(CEP7x2),7q31(D7S486x1)[94/100]                                                                                                                                                                               | nuc ish | 3q+; 7q-                                     |
| FA55 | F | <b>X</b> |          | 5  | no metaphases.nuc ish 3q26(EVI1x2),cen7(CEP7x2),7q31(D7S486x2),cen8(CEP8x2)[100]                                                                                                                                                                                                        |         |                                              |
| FA56 | M | <b>X</b> |          | 7  | 46,XY[5]                                                                                                                                                                                                                                                                                |         |                                              |
| FA57 | M | <b>X</b> |          | 6  | 46,XY[20]                                                                                                                                                                                                                                                                               |         |                                              |
| FA58 | M | <b>X</b> |          | 9  | 46,XY[16]                                                                                                                                                                                                                                                                               |         |                                              |
| FA59 | M |          | <b>X</b> | 14 | 45,XY,-7[9]/46,XY[6].nuc ish cen7(CEP7x1),7q31(D7S486x1)[13/100]                                                                                                                                                                                                                        |         | -7                                           |
| FA60 | F | <b>X</b> |          | 11 | 46,XX[15]                                                                                                                                                                                                                                                                               |         |                                              |
| FA61 | M |          | <b>X</b> | 17 | 45,XY,-7[20]/46,XY[1].nuc ish cen7(CEP7x1),7q31(D7S486x1)[93/100]                                                                                                                                                                                                                       |         | -7                                           |
| FA62 | M | <b>X</b> |          | 10 | 46,XY[6]                                                                                                                                                                                                                                                                                |         |                                              |
| FA63 | M | <b>X</b> |          | 8  | 46,XY[20]                                                                                                                                                                                                                                                                               |         |                                              |
| FA64 | F | <b>X</b> |          | 4  | 46,XX [20]                                                                                                                                                                                                                                                                              |         |                                              |
| FA65 | M | <b>X</b> |          | 6  | 46,XY,inc[1]                                                                                                                                                                                                                                                                            |         |                                              |
| FA66 | F | <b>X</b> |          | 10 | 46,XX[1]                                                                                                                                                                                                                                                                                |         |                                              |
| FA67 | F | <b>X</b> |          | 12 | 46,XX[15]                                                                                                                                                                                                                                                                               |         |                                              |
| FA69 | M | <b>X</b> |          | 10 | 46,XY[17]                                                                                                                                                                                                                                                                               |         |                                              |
| FA70 | M |          | <b>X</b> | 8  | 48,XY,+der(1;5)(q10;p10),t(1;5)(q10;p10),+8[2]/48,idem,add(2)(p16)[10]/48,idem,del(11)(q14)[6]/<br>49,idem,del(11)(q14),+19[2].nuc ish 1p32(CKS1Bx2),1q21(CDKN2Cx3)[52/100],<br>3q26(EVI1x3)[53/100],cen8(CEP8x3)[85/100], 21q22(5' AML1x1,3' AML1x2)(5' AML1 con<br>3' AML1x1)[69/100] |         | 1q+; 3q+; +8;<br>RUNX1 (AML1)<br>abnormality |
| FA72 | M | <b>X</b> |          | 6  | //46,XX[20]                                                                                                                                                                                                                                                                             |         |                                              |
| FA74 | F | <b>X</b> |          | 6  | 46,XX[20]                                                                                                                                                                                                                                                                               |         |                                              |
| FA75 | M | <b>X</b> |          | 7  | 46,XY[15]                                                                                                                                                                                                                                                                               |         |                                              |
| FA76 | M |          | <b>X</b> | 4  | //46,XX[17]/46,XY,ins(7;7)(q31;q31q35)[1]/46,XY[3].<br>ish,21q22(AML1x2)(5' AML1 sep 3' AML1x1)[46/100]                                                                                                                                                                                 | nuc     | cryptic RUNX1 (AML1)<br>aberration           |
| FA77 | M |          | <b>X</b> | 13 | 46,XY,del(7)(p12p21)[12]/46,XY[8]                                                                                                                                                                                                                                                       |         | 7p-                                          |
| FA79 | F |          | <b>X</b> | 10 | 47,X,add(X)(p22),+der(1)add(1)(p12)dup(1)(q12q43),der(3)t(3;?3)(p26;?q24)x2,<br>der(11)t(3;11)(q24;p15),der(15)t(3;15)(q24;q26)[cp15].nuc ish 1p36(SRDx2),<br>1q21(1q21x3-4)[75/100],1p36(SRDx4),1q21(1q21x4)[14/100],3q26(EVI1x3-6)[95/100]                                            |         | 1q+; 3q+                                     |
| FA80 | M | <b>X</b> |          | 7  | 46,XY[15]                                                                                                                                                                                                                                                                               |         |                                              |
| FA82 | M | <b>X</b> |          | 2  | 46,XY[10]                                                                                                                                                                                                                                                                               |         |                                              |
| FA83 | F | <b>X</b> |          | 4  | 46,XX,inc[10]                                                                                                                                                                                                                                                                           |         |                                              |
| FA84 | M |          | <b>X</b> | 16 | 46,XY,+1,dic(1;18)(p11;q22)[3]/46,XY[13].nuc ish 1p36(SRDx2),1q21(1q21x3)[10/100]                                                                                                                                                                                                       |         | 1q+                                          |
| FA85 | F | <b>X</b> |          | 23 | 46,XY[20]                                                                                                                                                                                                                                                                               |         |                                              |
| FA86 | F |          | <b>X</b> | 32 | 46,XX,der(1)t(1;1)(p36;q24)[8]/47,XX,+9[4]/46,XX[3].nuc ish 1p36(SRDx2),1q21(1q21x3)[53/100]                                                                                                                                                                                            |         | 1q+                                          |
| FA87 | M |          | <b>X</b> | 13 | 46,XY,der(1)t(1;1)(p36;q24)[8]/47,XX,+9[4]/46,XX[3].nuc ish 1p36(SRDx2),1q21(1q21x3)[53/100]                                                                                                                                                                                            |         | 1q+                                          |
|      |   |          |          | 14 | 46,XY,der(7)t(1;7)(?;p11)[3]/46,XY[12]                                                                                                                                                                                                                                                  |         | 1q+; 7p-                                     |
| FA89 | M |          | <b>X</b> | 20 | 46,XY,der(7)t(3;7)(q22;q31)[15].nuc ish 3q26(EVI1x3)[93/100], cen7(CEP7x2),7q31(D7S486x1)[96/100]                                                                                                                                                                                       |         | 3q+; 7q-                                     |
| FA90 | F | <b>X</b> |          | 13 | no metaphases.nuc ish cen7(CEP7x2),7q31(D7S486x2)[99/100],cen8(CEP8x2)[96/100]                                                                                                                                                                                                          |         |                                              |

|       |   |           |    |                                                                       |         |
|-------|---|-----------|----|-----------------------------------------------------------------------|---------|
| FA91  | M | <b>X</b>  | 16 | 46,XX[20]                                                             |         |
| FA92  | M | <b>X</b>  | 25 | 46,XY[16]                                                             |         |
| FA94  | F | <b>X</b>  | 32 | 46,XX[15]                                                             |         |
| FA95  | M | <b>X</b>  | 11 | 46,XY[15]                                                             |         |
| FA97  | M | <b>X</b>  | 9  | 46,XY[15]                                                             |         |
| FA99  | F | <b>X</b>  | 12 | 46,XX[20]                                                             |         |
| FA100 | M | <b>X</b>  | 13 | 46,XY,inc[12]                                                         |         |
| FA102 | M | <b>X</b>  | 16 | 46,XY[15]                                                             |         |
| FA108 | F | <b>X</b>  | 15 | 46,XX[1]                                                              |         |
| FA130 | F | <b>*1</b> | 13 | 46,XX,der(7)t(?3;7)(q26;q21)[2]/46,XX[13].nuc ish 3q26(EVI1x3)[4/100] | 3q+,7q- |

\* FA-BMF and FA-AIP: karyotype (ISCN) at time point of last cytogenic examination or at time point/s of last cytogenetic examination with aberrations;

FA-MDS-non EB, FA-MDS-EB and FA-AML: karyotype (ISCN) at time point of transformation

\*1 no categorization possible
